# Supplementary material for: The influence of normal distribution dispersion of fracture size on blockiness and REV of fractured rock masses
Source: Frontiers journal article supplement (doi:10.3389/feart.2023.1128167), 2023-02-21
Supplement: Data_Sheet_2.ZIP [file Data_Sheet_2.ZIP]

## Sheet: D=1.0 m
C=1.3 m	2.6	5.2	7.8	10.4	13	15.6	18.2	20.8	23.4	26
D=1 m	17.576	140.608	474.552	1124.86	2197	3796.42	6028.57	8998.91	12812.9	17576
V	2	4	6	8	10	12	14	16	18	20
1		140.6			2196.98	3796.4	6028.55	8998.87	12812.9	17575.9
2		140.603		1124.86	2197	3796.41	6028.53	8998.91	12812.9	17576
3	17.5756				2196.95	3796.29	6028.55	8998.87	12812.8	17575.8
4					2197	3796.41	6028.51	8998.8	12812.8	17575.5
5		140.607	474.551	1124.86	2197	3796.41	6028.5	8998.85	12812.7	17575.6
6					2197	3796.41	6028.51	8998.82	12812.8	17575.7
7		140.606			2196.99	3796.33	6028.37	8998.48	12812.2	17574.6
8		140.606		1124.85	2196.95	3796.33	6028.37	8998.66	12812.5	17575
9			474.552		2196.95	3796.33	6028.45	8998.8	12812.7	IFNP error
10				1124.82	2196.96	3796.23	6028.27	8998.4	12812.9
11			474.552	1124.81	2196.91	3795.96	too many blocks in one frame	too many blocks in one frame	too many blocks in one fram	too many blocks in one fram
12			474.534	1124.74	2196.88	3796.11	6028.04	8997.78	12812.9	too many blocks in one fram
13				1124.81	2196.9	3796.34	6028.45	8998.58	12812.9
14		140.606	474.532	1124.78	2196.94	3796.25	6028.24	8998.23	12812.9
15		140.607	474.542	1124.81	2196.91	3796.06	too many blocks in one frame	8997.83	too many blocks in one fram
16		140.6	474.541	1124.77	2196.84	3796.24	6027.99	8997.97
17			474.455	1124.8	2196.84	3796.23	6028.41	8998.46
18		140.596	474.452	1124.84	2196.82	3796.23	6028.14	8998.41
19			474.543	1124.84	2196.84	3796.23	6028.22	8998.4
20		140.595	474.54	1124.76	2196.91	3796.29	6028.25	8998.39
21	17.5752	140.601	474.55		2196.87	3796.03	too many blocks in one frame			too many blocks in one frame
22		140.608	474.534	1124.83	2196.89	too many blocks in one frame	too many blocks in one frame	too many blocks in one frame	12812.9	too many blocks in one frame
23		140.605	474.515	1124.77	2196.81	too many blocks in one frame	too many blocks in one frame	too many blocks in one frame	12812.9	too many blocks in one frame
24			474.544		2196.8	3796.24	6028.33	8998.62	12812.6
25		140.608	474.529	1124.78	2196.91	3796.23	6028.24	8998.38	12812.6
26		140.595	474.539	1124.75	2196.78	3795.93	too many blocks in one frame	too many blocks in one frame	too many blocks in one frame	too many blocks in one frame
27		140.608	474.55	1124.76	2196.86	3796.07	too many blocks in one frame	8998.22
28		140.602	474.507	1124.81	2196.9	3796.12	6028.14	8998.47	12812.4
29		140.606	474.548	1124.79	2196.84	3796.18	6028.31	8998.53	12812.3
30		140.603	474.552	1124.8	2196.89	3796.34	6028.32	8998.77	12812.7
31		140.602	474.501	1124.86	2196.84	3796.29	6028.23	8998.43	12812.3
32		140.607	474.498	1124.84	2196.95	3796.28	6028.29	8998.46	12812	17575.9
33		140.6	474.53	1124.83	2196.9	3796.2	6028.44	8998.6	12812.5
34			474.539	1124.82	2196.87	3796.22	6028.27	8998.71	12812.6
35		140.599	474.55	1124.84	2196.93	3796.34	6028.47	8998.66	12812.6	17575.3
36	17.5713	140.607	474.541	1124.82	2196.94	3796.35	6028.48	8998.82	12812.6
37			474.547	1124.85	2196.93	3796.36	6028.51	8998.78	12812.3	17575.5
38			474.537	1124.83	2196.98	3796.35	6028.5	8998.82	12812.8	17575.1
39		140.572	474.551	1124.85	2196.99	3796.38	6028.46	8998.82	12812.8	17575.2
40		140.605	474.543	1124.85	2196.99	3796.34	6028.52	8998.83	12812.9	17575
41		140.608	474.551	1124.85	2196.96	3796.4	6028.47	8998.86	12812.7	17575
42			474.548	1124.85	2196.99	3796.4	6028.52	8998.81	12812.8	17575.9
43				1124.85	2196.93	3796.39	6028.56	8998.9	12812.8	17575.4
44			474.549	1124.85	2196.98	3796.29	6028.43	8998.66	12812.9	17574.1
45			474.542	1124.86	2196.96	3796.34	6028.33	8998.05	12810.6
46			474.535		2196.99	3796.36	6028.54	8998.89	12812.7	17573.8
47			474.547	1124.84	2196.98	3796.41	6028.54	8998.9	12812.9	17575.8
48		140.607		1124.85		3796.36		8998.9	12812.9	17576
49			474.547	1124.86	2196.97	3796.39	6028.56	8998.91	12812.6	17573.7
50					2196.99	3796.41	6028.49	8998.82	12812.9	17574.9
51		140.606		1124.86	2197	3796.4		8998.9	12812.8	17575.9
52	17.5735			1124.86	2196.99	3796.41	6028.56	8998.91	12812.8	17575.8
53			474.537	1124.86	2196.97	3796.41	6028.51	8998.86	12812.9	17575.9
54			474.549	1124.86	2196.98	3796.39	6028.54	8998.89	12812.8	17575.9
55		140.608		1124.85	2196.93	3796.24	6028.04	8997.89	12810.1
56	17.576		474.551	1124.84	2196.93	3796.34	6028.54	8998.72	12812.7	17575.6
57				1124.85	2196.96	3796.34	6028.51	8998.9	12812.9	17575.9
58			474.526	1124.85	2196.98	3796.39	6028.53	8998.84	12812.1
59		140.607	474.544	1124.85	2196.99	3796.33	6028.47	8998.85	12812.8	17575.8
60	17.5511	140.564		1124.85	2196.98	3796.41	6028.55	8998.89	12812.9	17576
61		140.605	474.55	1124.85	2196.95	3796.39	6028.52	8998.77	12812.2	17575.9
62			474.552	1124.86	2196.98	3796.41	6028.55	8998.86	12812.8	17575.9
63			474.543	1124.85	2196.99	3796.4	6028.52	8998.84	12812.9	17575.8
64			474.552	1124.86	2196.98	3796.41	6028.57	8998.91	12812.8	17575.7
65			474.534	1124.86	2197		6028.56	8998.91		17576
66			474.548			3796.41	6028.56		12812.9	17576
67							6028.57	8998.88	12812.8	17575.4
68			474.552	1124.84	2196.99	3796.36	6028.52	8998.9	12812.9	17576
69			474.552	1124.86		3796.41		8998.88	12812.9	17576
70			474.552	1124.85	2196.97	3796.4	6028.5	8998.88	12812.6	17574.9
71			474.552	1124.86	2196.96	3796.41	6028.55	8998.91	12812.9	17575.9
72			474.551	1124.86	2197	3796.38	6028.55	8998.9	12812.9	17575.9
73				1124.86		3796.42		8998.91	12812.7	17574.6
74		140.607			2197	3796.39	6028.56	8998.91	!	17576
75			474.547	1124.86	2197	3796.41	6028.52	8998.87	12812.7	17575.8
76				1124.85	2197		6028.57	8998.91	12812.7	17575.8
77	17.5701		474.551		2196.94	3796.41	6028.55	8998.87	12812.9	17575.9
78		140.601	474.543	1124.84	2196.97	3796.35	6028.47		12812.8	17575.8
79			474.539	1124.86	2196.98		6028.57	8998.91	12812.7	17575
80		140.608	474.552	1124.86	2197	3796.42	6028.55	8998.81	12812.7	17575.7
81		140.607		1124.86	2196.99	3796.41	6028.54	8998.91	12812.9	17575.9
82					2197			8998.9	12812.9	17575.6
83	17.573	140.575	474.544		2197	3796.41	6028.55	8998.89	12812.9	17575.9
84					2196.99	3796.41	6028.55		12812.9	17575.6
85			474.544		2196.92	3796.42		8998.91	12812.9	17575.9
86					2196.98	3796.41			12812.9	17575.9
87		140.6	474.55	1124.86	2196.98		6028.57	8998.88	12812.9	17575.9
88	17.5707	140.604			2196.98	3796.41	6028.55		12812.5	17575.1
89		140.608	474.535	1124.86	2197		6028.57	8998.9	12812.9	17575.9
90			474.546	1124.85	2196.99	3796.41	6028.56	8998.87	12812.8	17575.7
91				1124.86	2197				12812.7	17575.8
92				1124.86	2196.99	3796.4	6028.55	8998.89	12812.8	17575.6
93			474.551	1124.83	2197	3796.41	6028.57	8998.9	12812.9	17576
94				1124.86	2197	3796.39	6028.55	8998.87	12812.7	17575.7
95		140.607		1124.86	2196.99	3796.41	6028.55	8998.88	12812.6	17575.3
96			474.551	1124.86	2196.96	3796.4	6028.53	8998.76	12812.5
97				1124.85	2196.99	3796.4	6028.57	8998.85	12812.9	17575.8
98			474.548		2196.99	3796.42	6028.54	8998.85	12812.7	error from blockfracture
99		140.607		1124.86	2197	3796.41	6028.53	8998.88	12812.8	17574.7
B	2	4	6	8	10	12	14	16	18	20
1		5.5388e-05			8.58898e-06	4.05698e-06	2.61256e-06	4.75991e-06	2.34966e-06	7.35503e-06
2		3.24235e-05		4.40587e-06	4.16477e-07	9.01903e-07	5.80038e-06	5.36732e-08	3.13746e-07	1.61738e-06
3	2.20756e-05				2.37396e-05	3.30638e-05	2.98827e-06	4.75991e-06	1.00347e-05	1.15019e-05
4					1.05553e-06	5.4288e-07	1.03268e-05	1.19589e-05	1.07011e-05	3.06676e-05
5		9.60116e-06	1.18638e-06	1.93979e-06	2.27219e-06	2.25028e-06	1.15279e-05	7.40567e-06	1.97209e-05	2.17024e-05
6					1.82066e-09	2.16415e-06	9.63264e-06	1.0198e-05	1.17657e-05	1.89547e-05
7		1.23677e-05			5.71552e-06	2.14808e-05	3.25991e-05	4.82451e-05	5.75534e-05	8.03611e-05
8		1.3911e-05		8.36812e-06	2.21944e-05	2.13636e-05	3.29876e-05	2.78588e-05	3.39097e-05	5.45482e-05
9			2.39567e-16		2.22972e-05	2.36091e-05	1.95675e-05	1.29014e-05	1.41109e-05
10				3.90492e-05	1.98821e-05	5.02345e-05	4.88667e-05	5.6462e-05	2.34966e-06
11			1.01359e-06	5.1312e-05	4.05935e-05	0.000119518
12			3.78104e-05	0.000106391	5.68912e-05	7.93435e-05	8.78708e-05	0.000125891	2.34966e-06
13				5.05226e-05	4.49549e-05	1.99406e-05	2.02561e-05	3.74113e-05	2.34966e-06
14		1.7467e-05	4.19216e-05	7.89313e-05	2.92472e-05	4.33714e-05	5.48639e-05	7.56891e-05	2.34966e-06
15		1.00492e-05	2.01285e-05	4.983e-05	4.30642e-05	9.48044e-05		0.00011982
16		5.7735e-05	2.26846e-05	8.43809e-05	7.3096e-05	4.70978e-05	9.50833e-05	0.00010427
17			0.000205434	5.87129e-05	7.30209e-05	4.84934e-05	2.57796e-05	5.01755e-05
18		8.84587e-05	0.000209779	2.3225e-05	8.30874e-05	4.97198e-05	7.0745e-05	5.6131e-05
19			1.84363e-05	2.26827e-05	7.14256e-05	4.90976e-05	5.69352e-05	5.70126e-05
20		9.1524e-05	2.56937e-05	9.11408e-05	4.12513e-05	3.43379e-05	5.21472e-05	5.79961e-05
21	4.29563e-05	5.21094e-05	3.7488e-06		5.92927e-05	0.000100926
22		8.81884e-07	3.78251e-05	3.0649e-05	4.8934e-05				2.34966e-06
23		1.87116e-05	7.79493e-05	8.23548e-05	8.59513e-05				2.34966e-06
24			1.66852e-05		9.03195e-05	4.75688e-05	3.95568e-05	3.29021e-05	2.72143e-05
25		4.97838e-08	4.76449e-05	7.3856e-05	4.16354e-05	4.84562e-05	5.48792e-05	5.86868e-05	2.48354e-05
26		8.91628e-05	2.73774e-05	0.000104006	0.000100215	0.000128157
27		1.56463e-06	4.4168e-06	9.64081e-05	6.57264e-05	9.16399e-05		7.67687e-05
28		4.28852e-05	9.48242e-05	5.16089e-05	4.52731e-05	7.8995e-05	7.13679e-05	4.96576e-05	4.11341e-05
29		1.12369e-05	8.91788e-06	6.17168e-05	7.23819e-05	6.16545e-05	4.25862e-05	4.29086e-05	4.92485e-05
30		3.36965e-05	4.63595e-08	6.11434e-05	5.1101e-05	2.06645e-05	4.15868e-05	1.57479e-05	1.63393e-05
31		3.99551e-05	0.000106802	5.96517e-06	7.36559e-05	3.20589e-05	5.66514e-05	5.39669e-05	4.41789e-05
32		4.3383e-06	0.000113206	2.51693e-05	2.16081e-05	3.52806e-05	4.68659e-05	4.99244e-05	6.68878e-05	7.35503e-06
33		5.77065e-05	4.56283e-05	3.15878e-05	4.41716e-05	5.72975e-05	2.12306e-05	3.42945e-05	3.39048e-05
34			2.79969e-05	4.24167e-05	5.85608e-05	5.2062e-05	5.00825e-05	2.19595e-05	2.7483e-05
35		6.36664e-05	5.19016e-06	1.79008e-05	3.15089e-05	2.10225e-05	1.6584e-05	2.81143e-05	1.99017e-05	4.25521e-05
36	0.000265077	4.38809e-06	2.37951e-05	4.25705e-05	2.66268e-05	1.83436e-05	1.37953e-05	1.0347e-05	2.03038e-05
37			1.02855e-05	1.03408e-05	3.03218e-05	1.36313e-05	9.71723e-06	1.41232e-05	4.72151e-05	2.84242e-05
38			3.08375e-05	3.085e-05	8.70141e-06	1.80317e-05	1.17434e-05	1.01146e-05	1.06501e-05	4.91294e-05
39		0.000254495	2.39594e-06	9.50959e-06	5.06509e-06	1.0424e-05	1.79567e-05	1.06783e-05	6.89547e-06	4.78765e-05
40		1.98353e-05	1.86892e-05	1.5233e-05	6.74238e-06	1.99896e-05	7.99792e-06	9.35135e-06	2.34966e-06	5.52555e-05
41		5.61846e-07	3.08712e-06	1.2341e-05	1.84201e-05	5.42038e-06	1.5582e-05	5.28686e-06	1.29173e-05	5.46698e-05
42			8.76827e-06	1.32532e-05	4.70778e-06	4.74184e-06	7.75806e-06	1.0803e-05	8.73635e-06	7.35503e-06
43				1.25909e-05	2.96081e-05	5.79626e-06	1.9892e-06	1.24448e-06	4.60364e-06	3.45525e-05
44			5.6685e-06	9.7674e-06	1.03869e-05	3.29679e-05	2.2864e-05	2.75851e-05	2.34966e-06	0.000110102
45			2.05583e-05	1.11569e-06	1.87879e-05	2.02728e-05	3.87236e-05	9.59344e-05	0.000181399
46			3.60087e-05		2.33045e-06	1.39202e-05	5.03187e-06	2.04647e-06	1.93428e-05	0.000124545
47			1.1023e-05	1.85249e-05	7.19071e-06	1.63997e-06	4.15323e-06	1.45651e-06	2.15954e-06	1.39118e-05
48		9.37358e-06		9.18422e-06		1.3547e-05		8.92997e-07	1.49693e-07	2.76081e-06
49			1.12422e-05	1.42862e-06	1.22107e-05	7.201e-06	1.36168e-06	7.74538e-08	2.59755e-05	0.000131745
50					6.70232e-06	2.30481e-06	1.36333e-05	1.07632e-05	2.34966e-06	6.50485e-05
51		1.62366e-05		1.89979e-06	2.09695e-06	2.94646e-06		1.19381e-06	4.69121e-06	5.20932e-06
52	0.000141045			4.84236e-06	3.24306e-06	1.78695e-06	1.71998e-06	3.77379e-07	6.18923e-06	1.21766e-05
53			3.24791e-05	4.09827e-07	1.41698e-05	2.09355e-06	9.33572e-06	5.97806e-06	3.768e-06	4.98003e-06
54			6.12578e-06	1.61442e-06	8.99636e-06	7.029e-06	5.41505e-06	2.83745e-06	4.84129e-06	3.12563e-06
55		2.13359e-08		1.65958e-05	3.12899e-05	4.74679e-05	8.80043e-05	0.000113745	0.000216398
56	2.27583e-07		2.04403e-06	1.97295e-05	3.12344e-05	2.05302e-05	5.28451e-06	2.17463e-05	1.93548e-05	2.32599e-05
57				9.65895e-06	1.85935e-05	2.0546e-05	9.20003e-06	1.38583e-06	3.52808e-06	5.55075e-06
58			5.42828e-05	8.60904e-06	9.6081e-06	7.46678e-06	5.8455e-06	7.48102e-06	6.28232e-05
59		6.82749e-06	1.74101e-05	9.50426e-06	4.73327e-06	2.32556e-05	1.57523e-05	6.6508e-06	6.85044e-06	1.12449e-05
60	0.00141926	0.000313041		1.06511e-05	8.03368e-06	9.85666e-07	2.89405e-06	1.99413e-06	3.49515e-06	1.58836e-06
61		1.96433e-05	4.83403e-06	1.53512e-05	2.48958e-05	7.09143e-06	8.11602e-06	1.58281e-05	5.31435e-05	7.35503e-06
62			2.00189e-07	5.24508e-08	1.08193e-05	5.79231e-07	3.12894e-06	5.53667e-06	5.05529e-06	7.35503e-06
63			1.99135e-05	1.01061e-05	4.93992e-06	5.24363e-06	8.71882e-06	8.1741e-06	4.07979e-06	1.02982e-05
64			2.57085e-07	4.91615e-07	7.35366e-06	6.59043e-07	3.71564e-08	4.91504e-07	5.92411e-06	1.57048e-05
65			3.6938e-05	2.48919e-08	1.26536e-07		1.04536e-06	4.85837e-07		5.68958e-07
66			9.20658e-06			1.21246e-06	1.25469e-06		5.93152e-09	1.64315e-07
67							2.45332e-07	3.41541e-06	5.53333e-06	3.34397e-05
68			2.48656e-07	1.95659e-05	2.90077e-06	1.37569e-05	8.66209e-06	1.62453e-06	1.57326e-06	2.7719e-06
69			1.04098e-06	4.01826e-07		2.85111e-06		3.34885e-06	2.69884e-07	7.47041e-07
70			7.67039e-07	1.02039e-05	1.18138e-05	3.89315e-06	1.18693e-05	3.09026e-06	1.99265e-05	6.47451e-05
71			1.66473e-07	4.80147e-06	1.67934e-05	1.57017e-06	3.44891e-06	2.42252e-07	3.11093e-07	5.58523e-06
72			2.31376e-06	1.33972e-06	3.23168e-08	8.55017e-06	3.06706e-06	1.11113e-06	1.33303e-07	3.00614e-06
73				2.64832e-06		4.55693e-08		3.98493e-07	1.42178e-05	8.13489e-05
74		7.51735e-06			1.98953e-06	6.4632e-06	5.75593e-07	2.02134e-16		5.49499e-07
75			1.12274e-05	4.10894e-06	7.24169e-07	1.31677e-06	8.33863e-06	4.6679e-06	1.79468e-05	9.79586e-06
76				1.52996e-05	3.59581e-08		1.79313e-07	3.7449e-08	1.31346e-05	9.37415e-06
77	0.000334035		2.33273e-06		2.64934e-05	2.61167e-06	2.23901e-06	4.85848e-06	2.00095e-06	7.31469e-06
78		5.02105e-05	1.91718e-05	2.26205e-05	1.56736e-05	1.70379e-05	1.58283e-05		1.16265e-05	1.09426e-05
79			2.71351e-05	5.75803e-06	7.27538e-06		-1.50864e-16	2.92369e-07	1.27528e-05	5.95232e-05
80		1.32283e-06	7.86004e-07	1.60908e-07	9.51297e-07	3.55599e-08	3.19728e-06	1.08152e-05	1.44454e-05	1.90655e-05
81		7.78761e-06		2.04647e-06	2.47929e-06	1.34917e-06	5.16756e-06	2.44252e-07	2.34966e-06	4.61038e-06
82					5.32544e-07			1.64187e-06	2.72553e-06	2.37757e-05
83	0.00017211	0.000235285	1.6523e-05		7.92444e-07	2.31429e-06	2.40953e-06	2.38773e-06	7.3543e-07	8.10173e-06
84					4.17888e-06	9.16127e-07	3.151e-06		3.54767e-06	2.26342e-05
85			1.70645e-05		3.77906e-05	1.89126e-07		4.33275e-07	6.89227e-07	3.99579e-06
86					7.27401e-06	7.09617e-07			7.84444e-07	3.73088e-06
87		5.86524e-05	3.41164e-06	1.10324e-06	6.93855e-06		9.18958e-08	3.24028e-06	1.15977e-06	8.03038e-06
88	0.000299556	3.06526e-05			7.20756e-06	1.98292e-06	3.13491e-06		3.07175e-05	5.12312e-05
89		9.45892e-07	3.5444e-05	4.19962e-06	3.64133e-09		3.60616e-07	1.23504e-06	7.37538e-08	5.58102e-06
90			1.19228e-05	8.63927e-06	3.27674e-06	3.57706e-07	1.92848e-06	4.75035e-06	1.07617e-05	1.86888e-05
91				2.54697e-06	0				1.34163e-05	1.39436e-05
92				1.99757e-06	3.35412e-06	3.79727e-06	3.73704e-06	2.94925e-06	4.22832e-06	2.08517e-05
93			2.27794e-06	2.92729e-05	2.27583e-09	4.32513e-07	3.45687e-07	1.41428e-06	8.84109e-07	2.25262e-06
94				4.22273e-07	7.05508e-08	5.61161e-06	3.05612e-06	5.01516e-06	1.73803e-05	1.54982e-05
95		8.36368e-06		4.14272e-07	6.47519e-06	8.60548e-07	2.72652e-06	3.22306e-06	2.2857e-05	3.83079e-05
96			1.41818e-06	5.92072e-07	1.68043e-05	3.80069e-06	6.51017e-06	1.68727e-05	3.51354e-05
97				1.142e-05	3.09923e-06	3.25886e-06	1.65711e-07	6.44856e-06	3.32118e-06	9.31207e-06
98			9.00428e-06		6.58261e-06	2.39567e-16	4.30334e-06	7.07019e-06	1.51662e-05
99		7.52447e-06		1.42684e-06	1.29677e-06	1.17084e-06	5.56169e-06	3.02681e-06	1.03591e-05	7.52876e-05
the mean of B	0.000299594	4.31994e-05	2.58306e-05	2.31143e-05	2.24884e-05	2.18336e-05	1.80993e-05	2.08227e-05	1.79701e-05	2.56561e-05

## Sheet: D=2.0 m
C=1.3 m	2.6	5.2	7.8	10.4	13	15.6	18.2	20.8	23.4	26
D=2 m	17.576	140.608	474.552	1124.86	2197	3796.42	6028.57	8998.91	12812.9	17576
V	2	4	6	8	10	12	14	16	18	20
1		140.576	474.105	1124.82	2196.74	3796.33	6027.43	8998.11	12812.1	17573.3
2		140.515	474.44	1124.6	2196.68	3796.24	6027.96	8998.52	12811.8	17574.8
3		140.605	474.515	1124.82	2196.65	3796.09	6028.38	8998.34	12812.2	17574.5
4		140.539	474.524	1124.66	2196.49	3796.37	6028.45	8998.39	12812	17574.7
5			474.434	1124.82	2196.92	3796.03	6028.35	8998.65	12812.2	17575.4
6		140.601	474.528	1124.82	2196.81	3796.06	6028.3	8998.64	12812.3	17575.1
7		140.605	474.45	1124.83	2196.95	3796.28	6028.34	8998.28	12811.6	17573.8
8			474.545	1124.86	2196.9	3796.35	6028.25	8997.87	12810.2	17571.8
9		140.599				3796.17	6027.82	8997.34	12808.5	error from fracture
10			474.5	1124.81	2196.99	3795.98	6027.38	8995.04	12807.9
11		140.499			2196.98	3796.16	6027.41	8996.05
12					2196.76	3795.33	6026.42	8994.38
13		140.605			2196.03	3795.06	6024.82	8993
14		140.474	474.551	1124.73	2196.15	3793.66
15		140.59	474.551	1124.59	2196.36	3795.23	6024.01	8992.48
16		140.474	474.49	1124.29	2196.04	3794.44	6024.54			too many blocks
17		140.542	474.059	1124.1	2195.39	3792.5
18		140.597	474.412	1124.1	2194.95	3791.68			too many blocks in one fram	too many blocks
19		140.605	474.353	1124.03	2195.13	3794.86				too many blocks in one fram
20		140.598	474.054	1124.59	2195	3793.02	too many blocks in one fram			too many blocks in one fram
21		140.605	473.812	1124	2194.91	3794.21			too many blocks in one fram	too many blocks in one fram
22		140.331	474.169	1124.21	2195.51	3792.68			too many blocks in one fram	too many blocks in one fram
23		140.549	474.222	1123.55	2194.54				too many blocks in one fram	too many blocks in one fram
24		140.452	474.299	1123.29	2195.06				too many blocks in one fram	too many blocks in one fram
25		140.511	474.458	1124.31	2194.66		too many blocks in one fram		too many blocks in one fram	ifnp error
26		140.603	474.328	1123.56	2194.89				too many blocks in one fram	too many blocks in one fram
27		140.294	474.241	1123.49	2195.39				too many blocks in one fram	too many blocks in one fram
28		140.586	474.381	1124.31	2195.55				too many blocks in one fram	too many blocks in one fram
29		140.293	473.952	1123.75	2194.44				too many blocks in one fram	too many blocks in one fram
30	17.5542	140.573	474.253	1122.67	2193.21				too many blocks in one fram	too many blocks in one fram
31		140.447	474.135	1123.85	2192.97	3793.09			too many blocks in one fram	too many blocks in one fram
32		140.129	474.238	1122.53	2194.14	3792.02			too many blocks	too many blocks in one fram
33		140.131	474.309	1124.13	2194.37	3791.98			too many blocks in one fram	too many blocks in one fram
34		140.554	474.132	1123.17	2195.24	3792.88			too many blocks	too many blocks in one fram
35		140.224	473.645	1124.28	2195.19	3794.28			too many blocks	too many blocks
36		140.597	474.313	1123.44	2195.35	3791.7			too many blocks	too many blocks
37		140.241	474.232	1124.43	2196	3793.38
38		140.605	473.755	1124.26	2195.55	3792.4		8993.28
39		140.605	474.254	1123.89	2196.08	3792.66	6025.14	8995.32	12809.1
40	17.2859	140.395	474.535	1124.17	2196.18	3793.8	6025.72	8993.24	12807.7
41		140.411	474.471	1124.24	2195.84	3792.84	6025.71	8993.82	12806.7	17570.9
42	17.5532	140.455	473.964	1124.25	2196.51	3795.29	6026.18	8996.52	12806.9
43	17.5657	140.605	474.486	1124.53	2196.86	3795.58	6025.32	8996.27	12808.3	17569.9
44	17.5642	140.429	474.228	1124.42	2195.73	3795.97	6026.57	8996.76	12808.4	17567.1
45		140.359	474.208	1124.38	2196.68	3795.43	6027.43	8996.84	12809.5	17569.6
46		140.502	474.14	1124.57	2196.17	3795.45	6026.76	8995.6	12809	17571.1
47		140.595	474.522	1124.3	2195.35	3795.91	6027.45	8996.72	12809.6	17570.8
48	17.5661	140.602	474.19	1124.55	2196.28	3795.2	6028.13	8997.6	12811.7	17574.5
49		140.471	474.36	1124.47	2196.28	3795.31	6028.13	8998.06	12811.9	17574.1
50	17.5685		474.549	1124.58	2196.87	3796.19	6028.31	8997.94	12811.4	17574.1
51		140.605	474.42	1124.78	2196.79	3796.08	6028.2	8997.86	12810.7	17574.4
52		140.543	474.499	1124.79	2196.88	3796.13	6028.5	8998.79	12810.6	17574
53		140.595	474.434	1124.75	2196.89	3795.67	6027.91	8997.65	12810	17573.6
54	17.5329	140.605	474.525	1124.56	2196.77	3795.23	6027.24	8997.29	12810.5	17573
55		140.597	474.385	1124.73	2195.98	3794.05	6025.4	8996.01	12806.5
56		140.607	474.391	1124.62	2196.03	3793.96	6026.45	8994.89	12806.7
57	17.5553	140.319	474.381	1124.51	2196.62	3795.13	6026.21	8995.21
58	17.5261	140.238	474.488	1124.39	2194.86	3793.99	6026.68	8996.29	12810	17573.3
59	17.5735	140.586	474.493	1124.29	2195.68	3795.76	6026.9
60	17.576	140.568	474.371	1124.61	2195.87	3795.26	6025.67	8996.51	12808.6	17572.3
61	17.5746	140.516	474.483	1123.4	2196.74	3795.61	6026.95	8996.17	12809.6	17571.8
62		140.605	474.432	1124.53	2196.64	3795.59	6027.45	8996.87	12810.8	17572.6
63	17.5733	140.443	473.632	1124.38	2196.62	3795.82	6027.23	8997.55	12811.4	17572.4
64		140.547	474.433	1124.4	2196.66	3795.42	6027.28	8997.33	12811.5	17572.5
65		140.605	474.221	1124.34	2196.77	3795.6	6028.11	8997.83	12812	17574.4
66		140.586	474.132	1124.23	2196.66	3795.45	6027.8	8997.23	12811.2	17574
67		140.605	474.414	1124.7	2196.33	3795.75	6027.64	8998.58	12812.1	17575.4
68			474.295	1124.47	2196.37	3795.95	6027.75	8997.29	12809.7	17569.2
69		140.605	474.218	1124.83	2196.77	3796.01	6027.89	8997.76	12810.7	17573.3
70	17.5751		474.387	1124.63	2196.67	3795.64	6027.07	8997.05	12811.5	17574
71	17.5688	140.605	474.497	1124.66	2196.2	3795.78	6026.71	8997.1	12811.4	17572.5
72	17.3808	140.527	474.376	1124.72	2195.47	3795.24	6026.91	8997.99	12810.9	17573.3
73	17.5105	140.595	474.391	1124.36	2196.17	3795.68	6027.15	8997.86	12812.1	17575.3
74		140.467	474.477	1124.6	2196.27	3795.91	6027.85	8997.43	12811.2	17573.5
75	17.4535	140.456	474.406	1124.66	2196.79	3796.18	6028.36	8998.49	12811.9	17574.1
76			474.552	1124.38	2196.4	3794.8	6027.92	8997.69	12811.5	17574.5
77	17.5698	140.566	474.272	1124.29	2196.29	3795.95	6026.87	8997.31	12811.1	17573.3
78	17.5158	140.522	474.549	1124.72	2196.66	3795.24	6026.8	8995.03	12807.2	17567.3
79	17.4567	140.364	474.087	1124.6	2196.71	3796.21	6028.26	8998.09	12812.4	17574.7
80	17.2238	140.589	474.537	1124.32	2196.77	3796.29	6028.44	8997.96	12812	17574.8
81		140.601	474.173	1124.64	2196.72	3795.66	6027.4	8997.72	12811.5	17574.6
82	17.5463		474.464	1124.69	2196.49	3795.08	6027.45	8998.41	12812.2	17574.9
83	17.5138	140.605	473.834	1124.32	2196.33	3795.76	6028.01	8998.19	12810.8	17573.2
84			474.228	1124.47	2196.74	3795.99	6028.28	8998.49	12812.4	17574.4
85		140.494	474.225	1124.75	2196.55	3795.82	6028.24	8998.21	12811.7	17574.4
86		140.592	474.19	1124.81	2196.84	3795.9	6028.18	8997.82	12811.7	17575
87	17.5135	140.503	474.542	1124.58	2196.27	3795.47	6027.97	8997.75	12810.3	17574.1
88		140.561	474.546	1124.16	2196.83	3795.6	6028.06	8998.27	12812.1	17574.3
89	17.5757		474.255	1124.41	2196.34	3795.54	6028.02	8998.28	12812.4	17575.5
90		140.599	474.396	1124.55	2196.63	3795.93	6027.92	8998.4	12811.4	17574.4
91		140.605	474.519	1124.48	2196.72	3795.62	6028.15	8998.19	12812.4	17575.7
92	17.5232	139.681	474.081	1124.82	2196.71	3796.31	6027.74	8997.54	12811.6	17573.6
93		140.605	474.388	1124.74	2196.7	3795.73	6027.97	8998.17	12812.3	17575.1
94		140.581	474.524	1124.72	2196.21	3795.79	6028.42	8998.42	12812.5	17575.6
95		140.591	474.371	1124.8	2196.52	3795.96	6027.94	8998.47	12811.6	17574.6
96	17.5529	140.378	474.406	1124.76	2196.72	3796.2	6028.31	8998.09	12811.4	17574.2
97	17.576		474.487	1124.79	2196.84	3795.94	6027.61	8997.65	12812	17575
98	17.5566		474.302	1124.74	2196.79	3796.01	6027.55	8997.72	12811.8	17574.7
99	17.5701	140.383	474.544	1124.3	2196.48	3795.68	6028.42	8997.38	12810.7	17574.6
B	2	4	6	8	10	12	14	16	18	20
1		0.000225286	0.000941705	3.70054e-05	0.000118708	2.36671e-05	0.000188788	8.95606e-05	6.5451e-05	0.000153099
2		0.000661833	0.000235412	0.000230367	0.000144363	4.62518e-05	0.000101127	4.32812e-05	8.33464e-05	6.81812e-05
3		2.17769e-05	7.78418e-05	4.10601e-05	0.000161166	8.62574e-05	3.13819e-05	6.34548e-05	5.22574e-05	8.79386e-05
4		0.000489481	5.98543e-05	0.000178985	0.000230437	1.13565e-05	1.98203e-05	5.77308e-05	7.267e-05	7.34359e-05
5			0.000248194	3.66151e-05	3.45608e-05	0.000102879	3.68416e-05	2.86805e-05	5.77608e-05	3.13228e-05
6		5.06301e-05	5.10039e-05	3.70054e-05	8.65872e-05	9.31671e-05	4.42553e-05	3.02088e-05	4.96332e-05	5.2821e-05
7		1.86618e-05	0.000215584	3.18945e-05	2.07569e-05	3.62268e-05	3.8578e-05	7.04897e-05	0.000103473	0.000123406
8			1.38784e-05	3.81646e-06	4.47178e-05	1.64866e-05	5.33589e-05	0.000115515	0.000207371	0.000241705
9		6.44842e-05				6.45714e-05	0.000124256	0.000174829	0.000342223
10			0.00010874	4.43067e-05	4.3614e-06	0.00011426	0.000196384	0.000429971	0.000393027
11		0.000772374			1.1091e-05	6.69292e-05	0.000191489	0.000318284
12					0.000111369	0.000286828	0.000355563	0.000504065
13		1.86618e-05			0.000439274	0.0003574	0.000622377	0.000656759
14		0.000952727	1.43504e-06	0.000116724	0.000384884	0.000724794
15		0.000126138	1.97028e-06	0.000244734	0.000292878	0.00031125	0.000756292	0.000714792
16		0.000953104	0.000130877	0.000512686	0.000435025	0.00052024	0.00066772
17		0.000471218	0.00103943	0.000679229	0.00073128	0.00103138
18		7.79756e-05	0.000294111	0.000679229	0.000934949	0.00124698
19		1.86618e-05	0.000419815	0.000737678	0.000852983	0.000409242
20		6.80189e-05	0.00104874	0.000239396	0.000909432	0.000894463
21		1.86618e-05	0.00155988	0.000769128	0.000949981	0.000579846
22		0.00196956	0.000807458	0.00058208	0.00067827	0.000984568
23		0.00041982	0.000696398	0.00116539	0.00112053
24		0.00111149	0.000534127	0.001396	0.00088465
25		0.000692827	0.000198048	0.000496018	0.00106358
26		3.3476e-05	0.000471415	0.0011584	0.000960646
27		0.00223102	0.000654967	0.00121782	0.000730827
28		0.000158419	0.00036101	0.0004916	0.000662197
29		0.00224325	0.00126404	0.000986645	0.00116377
30	0.00124289	0.000245697	0.000630586	0.0019534	0.00172559
31		0.00114187	0.000878155	0.000904501	0.00183594	0.000876362
32		0.00340877	0.000662406	0.00207257	0.00130356	0.00115924
33		0.00339255	0.000513059	0.00065443	0.00119812	0.00116728
34		0.000386543	0.000885313	0.00150428	0.000800112	0.00093244
35		0.00272938	0.00191171	0.000514738	0.000824066	0.00056229
36		7.63897e-05	0.000502923	0.00126918	0.000748817	0.0012429
37		0.00260913	0.000673899	0.000390125	0.000454795	0.000798745
38		1.86618e-05	0.00167862	0.000535163	0.000659336	0.00105774		0.000626189
39		1.86618e-05	0.000627135	0.000863867	0.000420702	0.000989717	0.000568198	0.000399643	0.000295755
40	0.0165032	0.00151803	3.5444e-05	0.000615508	0.000370963	0.000690219	0.000472759	0.000630091	0.000408522
41		0.00139973	0.000171275	0.000553416	0.000530247	0.000941048	0.000474029	0.000565588	0.000480922	0.000289736
42	0.00129614	0.00108533	0.00124	0.000548741	0.00022288	0.00029686	0.000395742	0.000265993	0.000464697
43	0.000585628	1.86618e-05	0.000138094	0.00029434	6.58066e-05	0.000219773	0.000538645	0.000293855	0.000359261	0.000347948
44	0.000672167	0.00126952	0.000681932	0.000392059	0.000578014	0.000117732	0.000332152	0.000239066	0.000353708	0.000504634
45		0.00176924	0.000723895	0.000427426	0.000145571	0.000260636	0.000188157	0.000229894	0.000266642	0.000361533
46		0.000754609	0.000868345	0.000263683	0.000379508	0.000255412	0.000299524	0.000368013	0.000301845	0.000275997
47		8.90703e-05	6.33123e-05	0.000504507	0.000751997	0.000132937	0.000185857	0.000243318	0.000261761	0.000298232
48	0.000561903	4.47699e-05	0.000763008	0.000278519	0.000325559	0.000320303	7.30626e-05	0.000146254	9.17669e-05	8.57762e-05
49		0.000974276	0.000405515	0.000348507	0.000329194	0.000291261	7.32117e-05	9.4285e-05	8.02543e-05	0.000106002
50	0.000424158		7.29109e-06	0.000256085	6.0843e-05	6.07786e-05	4.20828e-05	0.000108347	0.000115398	0.000106458
51		1.86618e-05	0.00027715	7.84753e-05	9.65339e-05	8.76827e-05	6.02471e-05	0.000116649	0.00017298	8.9615e-05
52		0.000463352	0.000111033	6.50816e-05	5.28635e-05	7.52254e-05	1.102e-05	1.39987e-05	0.000181623	0.00011574
53		8.94188e-05	0.000249539	0.000103351	4.96782e-05	0.000196548	0.000108915	0.000140551	0.000227192	0.000136847
54	0.00245465	1.86618e-05	5.71255e-05	0.000269625	0.000105186	0.000311839	0.000220205	0.000179723	0.000188921	0.000167931
55		8.17094e-05	0.000352615	0.00012105	0.000463592	0.000622856	0.000525462	0.000322397	0.000498276
56		4.03249e-06	0.000339385	0.000216718	0.000441117	0.000645711	0.000351936	0.000446595	0.000483632
57	0.00117649	0.00205291	0.00036132	0.000314382	0.000174918	0.000339079	0.000390404	0.000411142
58	0.0028379	0.00262875	0.000135433	0.00042483	0.000974361	0.000638788	0.0003128	0.000291018	0.000224139	0.000153048
59	0.000142581	0.000154934	0.000124404	0.00050767	0.000602019	0.000172055	0.000277244
60	0	0.000282416	0.000380525	0.000222937	0.000514657	0.000304679	0.000481108	0.000267002	0.000339659	0.000209214
61	7.94834e-05	0.000655731	0.000145354	0.00130036	0.000117557	0.000212275	0.00026919	0.000304761	0.000257796	0.000237986
62		1.86618e-05	0.000251979	0.000295907	0.000165808	0.00021689	0.000185244	0.000226979	0.000161169	0.000194015
63	0.000153846	0.00117122	0.00193943	0.000432789	0.000173992	0.000155885	0.000221376	0.0001515	0.000120767	0.000205111
64		0.000433112	0.000250613	0.000412433	0.000152929	0.000262572	0.000213075	0.000175717	0.000110433	0.000201242
65		1.86618e-05	0.000696613	0.000466871	0.000106684	0.000216179	7.59024e-05	0.000120342	6.69046e-05	9.03378e-05
66		0.000152943	0.000885473	0.000565678	0.000153564	0.000255273	0.000128113	0.000186872	0.000136574	0.000115334
67		1.86618e-05	0.000291039	0.000143429	0.00030324	0.000176179	0.000153895	3.64114e-05	6.61077e-05	3.66948e-05
68			0.00054228	0.00034978	0.000288142	0.000122139	0.000135382	0.000180292	0.000249093	0.000388441
69		1.88823e-05	0.000704787	2.80061e-05	0.000106614	0.000106451	0.000111693	0.000127521	0.000175797	0.000154
70	5.37665e-05		0.000348149	0.000210649	0.000149395	0.000205385	0.00024855	0.000206852	0.0001112	0.00011646
71	0.000409536	1.86618e-05	0.000115549	0.000185652	0.000362073	0.000167476	0.000308159	0.000201569	0.000113952	0.000196457
72	0.0111062	0.000578388	0.000369858	0.000130679	0.000695839	0.000308806	0.000275518	0.000102332	0.000160153	0.000152157
73	0.00372701	9.28823e-05	0.000338488	0.000449695	0.000378542	0.000193174	0.000235209	0.000117093	6.19663e-05	4.21157e-05
74		0.00100126	0.000158777	0.000232115	0.00033184	0.000134474	0.000118345	0.000164941	0.000131911	0.000142951
75	0.00696911	0.00108362	0.000308362	0.000180938	9.35043e-05	6.33869e-05	3.50232e-05	4.69828e-05	8.16891e-05	0.000109336
76			4.15128e-07	0.000430316	0.000272736	0.00042623	0.000107479	0.000136288	0.000106484	8.46868e-05
77	0.000352924	0.000295965	0.000590886	0.000512085	0.000321943	0.000121745	0.000281955	0.000178089	0.000142316	0.000156024
78	0.00342291	0.000614702	5.41353e-06	0.00012567	0.000155231	0.000309663	0.000293191	0.000431294	0.00044433	0.000495672
79	0.00678789	0.00173755	0.000980038	0.000234244	0.000132507	5.43721e-05	5.03846e-05	9.0976e-05	3.99063e-05	7.30541e-05
80	0.020037	0.000133229	3.19038e-05	0.00048106	0.000106868	3.44549e-05	2.10564e-05	0.000105307	7.39209e-05	7.0777e-05
81		4.74511e-05	0.000798146	0.00019792	0.000129301	0.000199327	0.000193029	0.000132051	0.000110352	7.73431e-05
82	0.00168924		0.000184553	0.000158955	0.000233073	0.000351017	0.00018616	5.56635e-05	5.76179e-05	6.49159e-05
83	0.0035404	1.86618e-05	0.00151301	0.000479653	0.000305798	0.000171488	9.25799e-05	8.04767e-05	0.000163044	0.000159703
84			0.000683628	0.000347585	0.000116107	0.000111166	4.8201e-05	4.63477e-05	4.18173e-05	9.0459e-05
85		0.000809776	0.000688336	0.000101818	0.000206242	0.000156737	5.39495e-05	7.81058e-05	9.4866e-05	8.89892e-05
86		0.000112085	0.000762224	4.38097e-05	7.13518e-05	0.000136476	6.50939e-05	0.000121237	9.35953e-05	5.6059e-05
87	0.00355422	0.000748336	2.02149e-05	0.000249366	0.000331792	0.000249915	9.86943e-05	0.000128804	0.000205324	0.000106943
88		0.000337776	1.22368e-05	0.000625824	7.77415e-05	0.000215449	8.4434e-05	7.13054e-05	6.24296e-05	9.81914e-05
89	1.54756e-05		0.000626494	0.000404484	0.000299655	0.000230385	9.16818e-05	7.07692e-05	4.27009e-05	3.09558e-05
90		6.53092e-05	0.000327745	0.000276167	0.000168448	0.00012722	0.000107497	5.65074e-05	0.000114447	8.82097e-05
91		1.86618e-05	6.94192e-05	0.000341144	0.000127396	0.000209451	6.99554e-05	7.99486e-05	3.93953e-05	1.89443e-05
92	0.00300228	0.00659095	0.00099293	4.25394e-05	0.000132254	2.71849e-05	0.000137688	0.000152105	0.000101507	0.000138158
93		1.86618e-05	0.000344906	0.000109844	0.00013725	0.000181682	9.9731e-05	8.2e-05	4.84719e-05	5.31356e-05
94		0.000193062	5.86153e-05	0.000128558	0.000359733	0.000164615	2.43529e-05	5.41928e-05	3.46659e-05	2.37164e-05
95		0.000119709	0.000382236	5.48351e-05	0.000216521	0.000119051	0.00010421	4.93505e-05	0.00010402	7.76341e-05
96	0.00131589	0.00163702	0.000308415	8.92188e-05	0.000128914	5.64322e-05	4.27531e-05	9.15388e-05	0.00011678	0.000103864
97	2.61721e-06		0.000137102	6.23035e-05	7.1066e-05	0.000124348	0.000158324	0.000140587	7.36306e-05	5.81921e-05
98	0.00110139		0.000527167	0.0001143	9.65894e-05	0.000107311	0.000168461	0.000132979	8.54962e-05	7.44242e-05
99	0.000335173	0.00159752	1.74839e-05	0.00050207	0.000238544	0.000193968	2.37645e-05	0.000170483	0.000169953	7.80214e-05
the mean of B	0.00298606	0.000732261	0.000476807	0.000432439	0.000401904	0.000336851	0.000199083	0.000197117	0.000170967	0.000142441

## Sheet: D=3.0 m
C=1.3 m	2.6	5.2	7.8	10.4	13	15.6	18.2	20.8	23.4	26
D=3 m	17.576	140.608	474.552	1124.86	2197	3796.42	6028.57	8998.91	12812.9	17576
V	2	4	6	8	10	12	14	16	18	20
1		140.578	474.463	1122.29	2195.61	3793.42	6023.61	8994.94	12807.8	17565.8
2		140.557	473.16	1122.73	2194.74	3789.99	6025.55	8985.65	12806.6	17569.7
3		140.232	474.478	1124.09	2194.25	3791.9	6023.57	8995.41	12808.6	17568.2
4			474.547	1124.02	2196.38	3793.95	6025.87	8994.75	12807	17570.1
5		140.282	474.478	1122.88	2195.43	3794.81	6021.65	8992.8	12808.4	17570.6
6		140.608	474.146	1124.66	2196.55	3795.05	6026.35	8995.46	12808.1	17570.9
7		140.557	474.44	1123.56	2195.54	3794.81	6026.97	8997.61	12811.5	17570.4
8		140.263		1124.72	2196.28	3792.53	6024.85	8995.85	12810.4	17570.5
9		139.721	474.484	1124.41	2195.71	3795.12	6025.32	8996.74	12807.9	17568.5
10		139.851		1124.83	2196.17	3795.92	6026.23	8995.81	12809	17564.2
11		140.22	474.508	1124.65	2196.39	3795.44	6027.51	8996.86	12808.6	17563.2
12		140.421	474.484	1124.13	2196.39	3793.92	6025.84	8992.82	12804.3
13		140.352	474.439	1124.25	2196.22	3794.72	6020.89	8986.3	12794.4
14		140.408	474.099	1124.21	2196.28	3794.46	6021.9	8981.55
15		140.495	474.524	1124.16	2196.36	3793.38	6020.32	too many blocks
16		140.477	474.29	1123.57	2195.87	3792.34	6020.15	8972.39
17		140.57	474.05	1123.49	2196.01	3789.11	6010.7			too many blocks
18			474.245	1124.2	2193.04	3780.48	6007.97			too many blocks
19		140.589	473.966	1122.65	2191.44	3783.95	6017			too many blocks
20			474.533	1121.61	2189.68	3783.14	6007.99			too many blocks
21		140.369	473.373	1119.36	2186.82	3779.21	6000.82			too many blocks in one fram
22		140.518	474.028	1121.63	2191.46	3783.28	6001.02			too many blocks in one fram
23		140.4	473.042	1121.88	2189.74				too many blocks	too many blocks in one fram
24		140.141	473.496	1122.11	2185.61	3776.85			too many blocks in one fram	too many blocks in one fram
25		140.594	471.659	1119.92	2187.08	3777.65			too many blocks in one fram	too many blocks in one fram
26		140.558	473.504	1121.45	2188.36				too many blocks in one fram	too many blocks in one fram
27		138.313	470.894	1120.83	2185.54				too many blocks in one fram	too many blocks in one fram
28		140.121	473.987	1119.76	2189.37				too many blocks in one fram	too many blocks in one fram
29		138.628	472.683	1118.58	2186.97				too many blocks in one fram	too many blocks in one fram
30		139.592	470.757	1122.1	2187.75			too many blocks	too many blocks in one fram	too many blocks in one fram
31			474.097	1119.89	2182			too many blocks	too many blocks in one fram	too many blocks in one fram
32		140.271	471.453	1120.1	2179.03			too many blocks	too many blocks in one fram	too many blocks in one fram
33		140.607	470.884	1115.45	2187.96			too many blocks	too many blocks in one fram	too many blocks in one fram
34		140.481	473.031	1119	2183.37			too many blocks		too many blocks in one fram
35		140.446	469.341	1118.53	2188.85	3777.79		too many blocks	too many blocks in one fram	too many blocks in one fram
36		140.602	470.384	1119.54	2195.61			too many blocks		too many blocks in one fram
37		140.283	471.396	1121.51	2188.39	3780.63			too many blocks	too many blocks in one fram
38		139.96	471.885	1118.2	2184.72				too many blocks	too many blocks in one fram
39		139.928	472.457	1119.61	2188.27	3778.5			too many blocks	too many blocks
40		138.617	473.829	1120.98	2187.97		5998.1		too many blocks	too many blocks
41		137.139	472.284	1117.47	2188.8		6008.04			too many blocks
42		138.427	473.076	1119.92	2188.58	3782.78	6011.25	8972.09
43		138.433	472.379	1122.66	2188.61	3786.86	6012.27	8975.62	12779
44		134.19	470.489	1122.64	2190.62	3782.13	6015.42	8980.76	12786.1
45		138.544	472.307	1123.62	2188.06	3788.13	6009.05	8984.67	12789.3	17548.9
46		140.348	471.172	1120.51	2185.26	3788.62	6017.72	8981.36	12786.1	17549.9
47		140.31	472.719	1121.01	2188.5	3788.09	6015.09	8982.65	12792.4	17550
48		140.601	474.091	1119.59	2190.08	3786.11	6022.04	8980.68	12792.6	17553.5
49		140.086	471.59	1123	2189.46	3786.27	6020.87	8991.58	12801.9	17560
50		140.372	469.93	1124.14	2194.96	3790.39	6021.9	8995.24	12805.8	17571.4
51		140.061	472.267	1123.04	2194.33	3792.52	6024.05	8993.04	12808.4	17565.8
52			473.862	1123.71	2195.8	3793.8	6024.24	8992.94	12807.5	17568.5
53			473.127	1124.38	2195.53	3793.94	6025.24	8992.51	12803.8	17557.7
54			474.494	1124.58	2193.29	3788.61	6018.84	8989.5	12797.7	17556.3
55			473.997	1124.15	2193.91	3793.18	6020.29	8978.78	12795.6
56		140.517	473.549	1121.29	2193.32	3781.39	6015.8	8971.63
57		139.98	472.598	1119.37	2193.56	3791.27	6013.65
58		139.343	472.749	1120.53	2190.7	3780.43	6009.51
59		140.039	473.794	1120.66	2193.83	3783.96	6020.88	8981.05
60		140.37	473.829	1123.01	2190.75	3787.55	6018.07
61		140.57	471.66	1121.1	2190.86	3788.17	6012.87
62		140.305	472.422	1121.19	2194.6	3788.62	6013.39	8987.46	12796.7
63		140.346	469.046	1121.21	2188.29	3787.72	6007.96	8985.02	12795.9	17557.2
64		136.831	473.755	1121.9	2189.66	3786.7	6019.25	8986.5	12788.2	17543.7
65		139.386	473.246	1121.29	2191.08	3787.91	6016.02	8983.51	12788.1	17561.7
66		139.486	471.038	1119.42	2192.67	3790.29	6019.63	8982.69	12791.9	17551.8
67		140.5	474.019	1122.96	2194.07	3790.4	6023.96	8992.73	12802.5	17562.8
68		140.216	472.623	1123.63	2194.2	3788.58	6020.04	8986.14	12794.2	17542.7
69		140.392	473.692	1123.75	2196.24	3788.52	6019.89	8990.72	12798.9	17555.4
70		139.556	473.048	1123.96	2189.5	3788.49	6019.24	8985.09	12794.6	17554.6
71		140.055	473.231	1122.99	2194.44	3785.24	6017.31	8988.62	12792.2
72		138.849	473.077	1121.73	2193.09	3790.32	6016.17	8986	12787.4
73			473.528	1121.63	2190.09	3787.99	6021.99	8988.78	12800.5	17565.7
74		139.847	473.976	1123.3	2194.12	3791.52	6015.06	8989.39	12795.3	17555.6
75		139.451	472.81	1123.4	2192.82	3793.03	6025.56	8994.58	12809.2	17570.6
76		140.476	474.436	1123.51	2193.98	3791.97	6017.51	8987.2	12797.5	17560.4
77		140.475	473.547	1122.97	2194.06	3787.17	6018.95	8986.23	12796.2	17558
78		140.582	473.993	1123.65	2192.6	3788.86	6020.65	8984.89	12778.8
79		140.51	473.124	1121.27	2192.01	3792.6	6021.12	8991.15	12800.2	17557
80			472.496	1123.5	2191.91	3791.15	6022.52	8993.29	12805.3	17567.7
81		140.567	473.216	1121.66	2195.57	3792.31	6023.39	8984.97	12801.2	17561.4
82		140.231	471.762	1119.43	2192.08	3788.39	6022.65	8988.99	12800.6	17558.7
83		139.895	471.98	1121.31	2191.59	3790.44	6019.05	8986.64	12800.9	17562.9
84		140.378	472.808	1122.59	2192.89	3791.06	6021.98	8991.07	12804.6	17567.6
85		139.172	473.188	1119.55	2195.81	3788.91	6020.2	8987.99	12798.5	17564.4
86			473.228	1123.52	2193.36	3792.25	6021.28	8988.22	12795.4	17557.2
87		140.455	473.967	1122.21	2193.26	3787.01	6019.92	8988.06	12797.5	17560.8
88		140.492	473.483	1121.99	2193.29	3790.52	6024.43	8990.83	12804	17567.7
89		140.597	473.991	1122.91	2193.32	3792.4	6023.46	8988.66	12804.2	17560.8
90		140.365	472.757	1122.39	2192.59	3790.09	6023.64	8993.34	12808.1	17569
91		139.451	473.101	1122.61	2193.56	3792.42	6025.04	8991.59	12805	17567.8
92		139.948	472.923	1122.19	2192.85	3790.59	6020.37	8992.37	12802.9	17555
93		140.29	472.874	1123.69	2194.28	3791.33	6019.43	8987.31	12801.9	17565.8
94		139.675	474.144	1123.17	2193.88	3790.48	6021.46	8990.04	12806.7	17568
95		138.259	472.219	1123.83	2195.57	3791.05	6022.92	8991.98	12805.5	17565.6
96		140.239	473.998	1121.71	2194.82	3790.16	6021.12	8994.62	12809.8	17567.8
97		140.567	473.831	1122.79	2194.03	3793.41	6022.55	8991.71	12801.3	17562.4
98		140.401	473.94	1122.12	2194.19	3792.63	6024.4	8993.42	12808.7	17566.3
99		139.153	473.208	1122.75	2192.63	3792.64	6022.19	8990.17	12804.8	17567.9
B	2	4	6	8	10	12	14	16	18	20
1		0.000216808	0.000186605	0.00228558	0.000634647	0.000788319	0.000822613	0.000440906	0.000397722	0.000579679
2		0.000364254	0.00293371	0.0019008	0.00102847	0.00169232	0.0005004	0.0014741	0.000495841	0.000356799
3		0.00267502	0.000156438	0.000688232	0.00125361	0.00119043	0.00082983	0.000389051	0.000332644	0.000441106
4			1.05805e-05	0.000748167	0.00028033	0.00065086	0.000448155	0.000462292	0.000461545	0.000333159
5		0.00231893	0.000156438	0.00176343	0.000712354	0.000424054	0.00114769	0.000679027	0.000353191	0.000306578
6		2.13359e-08	0.000854735	0.000185202	0.000202798	0.000358848	0.000368343	0.000383325	0.000376755	0.000292728
7		0.000364873	0.000235473	0.00115882	0.00066681	0.000421892	0.000265476	0.000145149	0.000106098	0.000317216
8		0.00245114		0.000127214	0.000327112	0.00102328	0.000616481	0.000339999	0.000195882	0.000312482
9		0.0063068	0.00014425	0.000406297	0.000586271	0.000340873	0.000539352	0.000241583	0.000389703	0.000428247
10		0.00538378		3.10509e-05	0.000379143	0.000130718	0.00038752	0.000345004	0.000307795	0.000668895
11		0.00275875	9.21353e-05	0.000186381	0.000276036	0.000256584	0.000175704	0.000228261	0.000339134	0.000725995
12		0.0013286	0.000142663	0.000654018	0.000277433	0.00065776	0.000452296	0.000676457	0.00067412
13		0.00181983	0.000238764	0.000543519	0.000353581	0.000445427	0.00127318	0.00140158	0.0014446
14		0.0014193	0.000954538	0.000580992	0.000328769	0.000514989	0.0011063	0.00192985
15		0.000801427	5.85689e-05	0.000625091	0.000293064	0.000799495	0.00136759
16		0.00093511	0.000551255	0.00115298	0.000513936	0.00107481	0.00139607	0.00294739
17		0.000267339	0.00105743	0.00122056	0.000452609	0.00192409	0.00296466
18			0.000646901	0.000587272	0.00180036	0.00419879	0.00341664
19		0.000136649	0.00123384	0.00196689	0.0025325	0.00328411	0.00191961
20			3.98249e-05	0.00289137	0.00333267	0.00349715	0.00341331
21		0.00170206	0.00248351	0.00489332	0.00463157	0.00453106	0.0046035
22		0.000638719	0.00110489	0.00287378	0.00251936	0.00345971	0.00457003
23		0.00148017	0.00318122	0.00265285	0.00330299
24		0.00332136	0.00222629	0.00245166	0.00518446	0.00515356
25		9.99588e-05	0.00609601	0.00439926	0.00451497	0.00494294
26		0.000352889	0.00220739	0.00303871	0.00393297
27		0.0163252	0.0077092	0.00358318	0.00521697
28		0.00346345	0.00119132	0.00454072	0.00347094
29		0.0140807	0.00393894	0.00558628	0.00456659
30		0.00722336	0.00799791	0.00245861	0.00421116
31			0.000958361	0.00442286	0.00682771
32		0.00239607	0.00653118	0.00423449	0.00817913
33		8.88996e-06	0.00772884	0.0083646	0.00411405
34		0.00090263	0.00320465	0.00521349	0.00620614
35		0.00114985	0.0109818	0.00563065	0.00371129	0.00490737
36		4.58722e-05	0.00878231	0.00473315	0.000634647
37		0.00230803	0.0066508	0.00297854	0.00391794	0.00415717
38		0.00460792	0.0056202	0.00592265	0.0055916
39		0.00483751	0.00441555	0.00467341	0.00397298	0.00471948
40		0.0141571	0.00152402	0.00345144	0.00411063		0.00505344
41		0.0246699	0.0047793	0.00657622	0.00373202		0.00340462
42		0.0155129	0.00311053	0.00439718	0.00383046	0.00359113	0.00287317	0.00298015
43		0.0154714	0.00457966	0.00195658	0.00381888	0.00251729	0.00270419	0.0025882	0.00264361
44		0.0456459	0.00856095	0.00197544	0.00290304	0.00376263	0.00218153	0.00201661	0.00209003
45		0.0146806	0.0047312	0.0011033	0.00406927	0.00218286	0.0032371	0.00158262	0.00183916	0.00154126
46		0.00184892	0.00712246	0.00387055	0.00534318	0.002054	0.00179946	0.00195048	0.00209416	0.00148563
47		0.00211649	0.00386317	0.00342515	0.00386967	0.00219213	0.00223638	0.00180712	0.00159865	0.00147753
48		5.29273e-05	0.000971523	0.00468629	0.00315071	0.00271559	0.00108293	0.0020262	0.00158434	0.00127756
49		0.00370892	0.00624269	0.00165649	0.0034321	0.00267357	0.00127699	0.000814955	0.000855996	0.000910495
50		0.00167985	0.00974039	0.000641263	0.000926973	0.0015864	0.00110556	0.000408	0.000554712	0.000262925
51		0.00389122	0.00481492	0.00162511	0.00121657	0.00102711	0.000749964	0.000652686	0.000348322	0.000580751
52			0.00145475	0.00102217	0.000544944	0.000687824	0.000717269	0.000663441	0.000424388	0.000428279
53			0.00300318	0.000432277	0.000667115	0.000652787	0.000552093	0.000711465	0.000712668	0.00103961
54			0.000122482	0.000250157	0.00168886	0.00205638	0.00161334	0.00104578	0.00118631	0.00112
55			0.00116939	0.000630593	0.0014076	0.000851926	0.00137374	0.00223768	0.00134782
56		0.000644003	0.00211297	0.003178	0.00167547	0.00395912	0.00211808	0.00303134
57		0.00446737	0.00411853	0.0048825	0.00156524	0.00135677	0.00247535
58		0.00899373	0.00379859	0.003852	0.00286687	0.00421121	0.00316155
59		0.0040446	0.00159827	0.00373602	0.00144144	0.00328169	0.00127449	0.00198507
60		0.00168984	0.00152412	0.00165185	0.00284421	0.00233532	0.00174207
61		0.000271812	0.00609493	0.00334352	0.00279252	0.00217309	0.00260312
62		0.00215222	0.00448894	0.00326825	0.00109387	0.00205356	0.00251742	0.00127259	0.00126326
63		0.0018626	0.0116015	0.0032479	0.00396268	0.00229008	0.00341812	0.00154341	0.00132663	0.00107173
64		0.0268629	0.00168042	0.00263399	0.00333968	0.00255797	0.00154563	0.00137916	0.00192737	0.0018373
65		0.00869374	0.00275117	0.00317294	0.00269482	0.00223999	0.00208078	0.00171198	0.00193854	0.00081365
66		0.00797819	0.00740571	0.00484355	0.00197135	0.00161233	0.00148198	0.00180283	0.00163698	0.00137833
67		0.000768214	0.00112333	0.0016915	0.00133506	0.00158581	0.000764403	0.000687092	0.000809335	0.000749024
68		0.00278478	0.00406451	0.00109303	0.00127411	0.0020644	0.00141497	0.00141981	0.00145672	0.00189191
69		0.00153584	0.00181178	0.000988597	0.00034735	0.00207907	0.00143918	0.000910646	0.00108971	0.00117324
70		0.00748122	0.00316894	0.000801455	0.00341538	0.00208898	0.00154741	0.0015357	0.00142611	0.00121838
71		0.00393623	0.00278355	0.00166988	0.00116739	0.00294414	0.00186749	0.00114345	0.00161418
72		0.0125075	0.00310746	0.00278608	0.00177853	0.00160674	0.00205728	0.00143437	0.00198809
73			0.00215771	0.00287378	0.00314377	0.00221891	0.00109108	0.00112573	0.000971408	0.000583419
74		0.00541223	0.00121415	0.00138985	0.00131209	0.00128925	0.00224143	0.00105825	0.00137343	0.00116011
75		0.00822807	0.00367098	0.00130109	0.00190353	0.000892544	0.000498932	0.000481683	0.000286398	0.000309419
76		0.000939143	0.00024477	0.00120027	0.00137568	0.00117062	0.00183378	0.00130156	0.00119957	0.000886466
77		0.000943289	0.00211811	0.00168357	0.00133695	0.00243601	0.00159471	0.00140964	0.0013072	0.00102161
78		0.00018563	0.00117817	0.001076	0.00200087	0.00198936	0.00131296	0.00155836	0.00266019
79		0.000696838	0.00300945	0.00319227	0.00227296	0.00100614	0.0012352	0.000862767	0.000991311	0.00108273
80			0.00433161	0.00121361	0.00231575	0.00138702	0.00100288	0.000625212	0.000594035	0.000474766
81		0.000289635	0.00281563	0.00285272	0.000651668	0.00108059	0.000859368	0.00154927	0.000916246	0.00083225
82		0.0026841	0.00587892	0.00483261	0.00223839	0.00211465	0.000981262	0.00110281	0.000959418	0.000985158
83		0.00506883	0.00542066	0.00315923	0.00246428	0.00157433	0.00157805	0.00136426	0.000939436	0.000747693
84		0.00163352	0.00367472	0.00202253	0.00187249	0.00141151	0.00109358	0.000871785	0.000647676	0.00047839
85		0.0102151	0.00287424	0.00472536	0.000541919	0.00197632	0.00138851	0.00121318	0.00112135	0.000658657
86			0.00278987	0.00119049	0.00165574	0.00109783	0.00120858	0.00118781	0.00136696	0.00106918
87		0.00108862	0.00123293	0.00235919	0.00170383	0.00247843	0.00143377	0.00120575	0.00119996	0.000862966
88		0.000823787	0.00225206	0.00255136	0.0016869	0.0015524	0.000686016	0.000898337	0.000697652	0.000474079
89		7.75845e-05	0.00118316	0.0017347	0.00167727	0.00105828	0.000846687	0.00113893	0.00068089	0.000867224
90		0.00172952	0.00378173	0.00220362	0.00200683	0.00166614	0.000817272	0.000619261	0.000376497	0.000396817
91		0.008229	0.00305697	0.00200622	0.00156595	0.00105299	0.000585182	0.000814135	0.000616904	0.000467327
92		0.00469236	0.00343291	0.00237393	0.00188792	0.00153458	0.00135929	0.000727043	0.000780107	0.00119591
93		0.00226099	0.0035369	0.00104146	0.00123857	0.00133848	0.00151591	0.00128889	0.000857411	0.000580847
94		0.00663499	0.000858888	0.00150363	0.00141864	0.00156307	0.00117975	0.000986206	0.0004839	0.000456341
95		0.0167052	0.00491627	0.000920551	0.000652404	0.00141292	0.000937627	0.000770225	0.000577325	0.000590143
96		0.00262659	0.0011673	0.00280494	0.0009927	0.0016476	0.00123574	0.0004764	0.000242415	0.000464485
97		0.00028955	0.00152019	0.00184013	0.0013518	0.000792025	0.000999006	0.000799818	0.000906305	0.000772443
98		0.00147356	0.00129056	0.0024393	0.00127794	0.000998303	0.000691452	0.000610586	0.000326803	0.000552529
99		0.0103451	0.00283118	0.00187967	0.00198885	0.000994257	0.0010579	0.000971414	0.000635185	0.000461032
the mean of B		0.00486224	0.00313577	0.00247747	0.00228034	0.00193262	0.00157709	0.00116589	0.000989814	0.000790045

## Sheet: D=6.5 m
C=1.3 m	2.6	5.2	7.8	10.4	13	15.6	18.2	20.8	23.4	26
D=6.5 m	17.576	140.608	474.552	1124.86	2197	3796.42	6028.57	8998.91	12812.9	17576
V	2	4	6	8	10	12	14	16	18	20
1	16.148	116.093	451.159	1065.4	2139.45	3662.62	5742.13	8567.46
2	6.80472	95.196	437.414	1105.93	2164.45	3743.99	5816.51	8635.21	12442.4
3	12.3827	74.913	448.372	1074.19	2117.87	3671.65	5843.12	8568.62	12428.2	17074.8
4	14.4429	140.023	450.325	1105.43	2138.32	3744.33	5929.16	8685.02	12530.5	17196.6
5		137.583	448.489	1110.79	2168.06	3734.05	5865.94	8845.92	12426.5	17224.9
6	14.8858	136.051	454.872	1102.78	2160.48	3718.58	5861.87	8849.25	12598.2	17252.7
7	16.3382	138.758	471.787	1106.18	2139.45	3756.08	5954.06	8664.25	12611.8	17309.2
8	11.1089	138.52	474.449	1110.2	2168.6	3714.54	5935.6	8673.28	12601.3	17194.7
9	5.56727	123.209	452.817	1113.92	2171.83	3755.83	5944.13	8570.13	12679.8	17345.3
10	11.098	120.862	474.013	1109.07	2166.51	3751.54	5954.85	8652.34	12665.1	17339.5
11	10.4116	129.254	443.501	1110.31	2161.86	3749.85	5976.76	8740.29	12687.9	17403.6
12	10.3348	111.037	470.252	1114.16	2168.2	3724.47	5974.18	8721.38	12750	17449.6
13	2.89325	131.723	453.894	1107.82	2135.62	3777.97	5993.21	8588.75	12647.1
14	8.50068	125.808	474.315	1109.44	2157.88	3762.4	5978.11	8541.09	12720.1	17437.7
15	8.34068	134.74	471.425	1113.78	2196.99	3793.4	6001.38	8693.07	12709.1
16	7.70405	140.593	473.672	1118.14	2157.93	3776.43	6009.03	8667.78	12676.2	17352.3
17	7.05388		454.4	1102.89	2186.78	3781.79	5928.14	8605	12644.2	17274.8
18	5.84744	137.986	442.258	1090	2153.55	3783.45	5986.51	8619.72
19	6.6428	140.496	468.756	1115.93	2169.73	3779.85	5957.33	8666.7	12618.6
20	5.0119		470.776	1123.6	2188.57	3751.19	5926.2	8724.97
21	4.29535	140.589	471.001	1122.4	2189.99	3728.66	5880.51	8560.45
22		140.539	467.932	1112.86	2177.03	3706.67	5763.81	8658.16
23	10.6074	140.251	472.927	1105.1	2143.28	3717.57	5820.64	8679.42
24			472.395	1123.13	2156.81	3703.81	5812.8	8728.06
25		139.57	468.68	1117.32	2124.38	3601.57	5679.69	8521.99
26	15.2736		474.413	1105.26	2099.13	3571.86	5737.98	8627.63
27	14.1291	140.205	468.556	1086.87	2083.5	3554.97	5720.34	8670.82
28		140.402	473.543	1093.55	2076.08	3569.87	5642.47	8673.69
29		130.289	464.543	1077.13	2036.61	3440.23	5492.64	8634.03
30	17.0587	131.81	449.35	1017.1	2028.23	3497.18	5314.85	8523.83
31	14.8874	123.52	460.655	1028.59	2036.57	3426.84	5523.95			too many blocks
32	4.76855	87.5322	421.489	1021.51	1942.01	3311.91	5403.09			too many blocks
33	7.22456	123.425	442.622	1030.42	2009.44	3377.27	5349.19			too many blocks
34	6.55725	71.2454	383.134	957.844	2139.45		5229.21			too many blocks
35	10.3399	49.8776	366.994	1029.44	1953.91	3393.94	5463.59			too many blocks
36	5.17234	94.1037	328.481	927.989	1954.35	3299.25	5269.41			too many blocks
37	1.88272	36.9561	241.75	915.977	1957.75		5466.02			too many blocks
38	2.02273	11.5969	269.918	846.645	2139.45	3245.12	5192.67			too many blocks
39	2.59152	22.2167	132.494	843.075	1798.02	3465.36	5435.17			too many blocks
40	10.9572	91.8017	341.503	927.428	1917.46	3447.15	5453.39			too many blocks
41	7.98905	59.0823	334.107	862.13	1846.07	3310.34	5146.33
42	13.8237	119.169	357.744	788.024	1896.87	3307.4
43	16.8423	102.158	309.324	921.941	1797.03	3283.24
44	6.54333	127.756	417.801	875.219	1861.86	3204.11
45	7.93102	119.998	338.372	989.098	2139.45	3320.52	5334.64
46	2.84449	102.849	397.034	1049.34	1917.05	3316.73	5276.76
47	5.63312	94.3797	422.155	987.628	1946.76	3453.81
48	12.8248	134.132	457.359	1044.17	2028.69	3500.9	5513.15
49	17.3809	122.94	437.6	1025.72	2051.6	3529.64	5634.82	8567.46
50	5.49126	125.91	443.988	998.093	1997.42	3493.3	5795.78	8635.21
51	2.13915	133.035	461.126	1059.38	2065.15	3634.8	5797.33	8568.62	12489
52	12.3494	124.1	459.72	1050.72	2139.45	3581.74	5700.61	8685.02	12515.3
53	15.1063	130.003	438.396	1077.88	2115.94	3698.01	5903.45	8845.92	12635.2	17302.1
54	2.21819	131.402	448.633	1079.44	2165.35	3687.14	5882.57	8849.25	12626.2	17207.6
55	16.4754	132.963	440.015	1104.18	2146.13	3747.28	5909.11	8800.98	12567.6
56	13.822	118.941	456.928	1104.95	2153.8	3686.45	5846.56	8375.36
57	13.4933	127.487	440.746	1084.09	2143.04	3641.96	5802.53	8673.28	12359.7
58	8.83988	85.141	459.362	1074.13	2088.33	3638.98	5792.18	8549.18
59	3.87383	127.966	444.169	1058.99	1994.07	3510.8	5798.59
60	2.47301	48.121	383.86	1051.5	2064.51	3597.55	5577.54	8375.38
61	3.2342	75.3177	459.125	1087.06	2060.11	3528.01	5695.93	8501.41
62	7.48444	99.599	402.205	1067.02	2075.45	3475.03	5547.05	8375.36
63	14.9215	133.569	375.864	993.735	2139.45	3269.25	5478.22	8222.93	too many blocks
64	17.3893	136.833	442.944	1010.2	1958.24	3374.44	5506.28	8258.13
65	11.6182	105.543	428.627	984.927	1973.19	3455.53	5549.89	8415.27
66	8.19545	115.21	461.082	1062.12	2037.76	3583.78	5740.87	8570.13
67	2.28224	118.08	438.463	1057.98	2116.46	3595.05	5802.4	8652.34
68		138.092	442.602	1064.15	2145.09	3720.1	5848.94	8740.29	12437.2
69	17.2559	138.658	450.165	1094.54	2114.92	3643.88	5806.64	8723.12
70	4.48847		470.548	1120.19	2153.08	3651.57	5742.64	8588.75
71	0.732057	114.132	450.192	1099.09	2063.21	3526.25	5597.61	8441.24
72	17.0129	121.247	418.502	1023.28	1987.05	3473.02	5476.83	8374.45
73	4.64285	138.509	425.164	962.347	1881.92	3398.49	5462.12	8471.08
74	4.75881	113.263	401.186	1021.27	1999.85	3418.15	5529.55	8420.48
75	2.86692	84.9547	444.9	1036.98	2067.71	3548.45	5658.77	8541.09	12427.4
76	3.94776	134.435	441.305	1075.11	2125.89	3719.33	5872.42	8693.07	12414.5
77	8.58702	133.319	467.311	1045.47	2116.43	3561.01	5690.98	8667.78	12289.6
78	15.2842	86.5667	424.433	984.54	2057.54	3514.67	5754.63	8426.8
79	5.5369	133.151	437.173	1008.22	1988.15	3506.62	5614.01	8556.68
80	9.86439	95.0881	455.885	1052.44	2070.64	3555.73	5724.22	8605	12344.3
81	8.09562	137.8	456.082	1084.24	2153.75	3688.34	5827.92	8619.72	12297.5
82	8.098	98.8002	426.759	1051.74	2096.08	3641.1	5776.46	8517.35
83	6.72952	135.419	431.406	1068.82	2011.37	3440.89	5656.02	8193.77
84	4.68374	117.823	443.714	1025.01	2117.38	3625.18	5826.15	8666.7	12286.9
85	11.6399	140.567	453.475	1040.14	2058	3534.92	5606.63	8635.22	12121.5
86	10.6292	110.412	460.002	1057	2088.83	3636.68	5787.64	8724.97	12286.1
87	1.83629	135.29	431.258	1063.82	1996.69	3550.75	5635.16	8560.45
88	14.9775	131.16	434.739	1090.85	2150.29	3733.43	5774.76	8658.16	12334.3
89	4.22377	113.971	438.794	1000.64	2112.28	3564.23	5689.58	8679.42	12313.7
90	13.1116	134.804	462.704	1071.86	2060.17	3606.98	5825.26	8735.29	12373.4
91	1.04202	118.506	409.389	1052.24	2056.89	3615.54	5814.86	8728.1	12234.4
92	13.5113	103.69	398.428	1048.68	2004.43	3604.33	5698.77		12129.5
93	16.988	80.5791	451.66	1034.13	2042.31	3512.31	5643.9	8627.63	12230.6
94	14.3337	114.692	410.075	965.915	2011.32	3587.54	5743.28	8670.82	12322.2
95	11.0505	35.0128	426.64	1069.71	2093.79	3593.91	5836.58	8673.69	12301.5
96	8.30628	81.42	424.986	1058.96	2029.87	3622.24	5850.88	8665.83	12407.6
97	11.4342	138.429	448.582	1092.36	2102.2	3648.88	5761.46	8692.3	12271.8
98	9.63374	64.927	451.682	1033.22	2074.4	3630.34	5803.68	8679.42	12338.7
99	7.90893	126.052	430.977	1070.12	2062.71	3612.72	5718.63	8523.83	12318.4
B	2	4	6	8	10	12	14	16	18	20
1	0.0812453	0.174353	0.0492959	0.0528639	0.0261964	0.0352426	0.0475127	0.0479454
2	0.61284	0.322969	0.0782593	0.0168304	0.0148147	0.0138098	0.0351749	0.0404167	0.0289185
3	0.295476	0.467221	0.0551678	0.0450468	0.0360178	0.0328642	0.0307617	0.0478155	0.0300281	0.028514
4	0.17826	0.0041634	0.0510532	0.0172801	0.0267103	0.0137204	0.0164899	0.0348815	0.0220398	0.0215859
5	0	0.0215153	0.0549223	0.0125096	0.0131705	0.0164288	0.0269758	0.0170007	0.0301598	0.0199781
6	0.15306	0.0324103	0.0414715	0.0196364	0.0166245	0.0205028	0.0276521	0.0166307	0.0167592	0.018396
7	0.0704281	0.0131541	0.00582626	0.0166067	0.0261964	0.0106248	0.0123594	0.0371895	0.0156944	0.0151812
8	0.367952	0.0148531	0.000216703	0.0130406	0.0129273	0.0215665	0.0154209	0.0361855	0.0165163	0.0216971
9	0.683246	0.123741	0.0458003	0.00972572	0.0114546	0.0106915	0.014007	0.0476484	0.0103848	0.0131253
10	0.368573	0.14043	0.00113614	0.0140405	0.0138797	0.0118195	0.0122286	0.0385126	0.0115328	0.0134541
11	0.407623	0.0807467	0.065433	0.0129366	0.0159947	0.0122664	0.00859413	0.0287387	0.0097557	0.00981125
12	0.411992	0.210306	0.00906124	0.00951393	0.0131097	0.0189508	0.00902189	0.0308403	0.00490841	0.00719446
13	0.835387	0.0631909	0.0435326	0.015156	0.0279365	0.00485751	0.00586512	0.0455789	0.012944
14	0.516347	0.105254	0.000498822	0.0137125	0.0178042	0.00896	0.00837003	0.0508751	0.00724256	0.00786849
15	0.52545	0.0417323	0.00658856	0.0098568	4.05917e-06	0.000793904	0.00451051	0.0339867	0.00809997
16	0.561672	0.000105442	0.00185362	0.00597351	0.0177851	0.00526359	0.00324118	0.0367966	0.0106691	0.0127278
17	0.598664	0	0.0424662	0.0195316	0.00465399	0.00385361	0.0166585	0.0437737	0.0131698	0.0171392
18	0.667305	0.0186465	0.0680524	0.0309956	0.0197773	0.00341551	0.00697617	0.042138
19	0.622053	0.000793838	0.0122138	0.00793891	0.0124137	0.00436299	0.0118161	0.0369166	0.0151644
20	0.714844	0	0.00795768	0.00112107	0.00383815	0.0119128	0.0169805	0.0304414
21	0.755613	0.000135888	0.00748297	0.00219418	0.00318913	0.017848	0.0245591	0.0487244
22	0	0.000494225	0.013951	0.0106738	0.00908772	0.0236401	0.0439169	0.0378657
23	0.396482	0.00253754	0.0034238	0.0175702	0.0244533	0.0207687	0.0344906	0.0355037
24	0	0	0.00454622	0.00154529	0.0182952	0.024394	0.0357908	0.0300986
25	0	0.00738538	0.0123742	0.00670993	0.033055	0.0513234	0.0578712	0.0529976
26	0.130997	0	0.000293652	0.0174272	0.0445488	0.0591482	0.0482019	0.0412589
27	0.196115	0.00286878	0.0126348	0.0337777	0.0516623	0.0635974	0.0511283	0.0364588
28	0	0.00146839	0.00212573	0.0278352	0.055038	0.0596736	0.064044	0.0361398
29	0	0.0733895	0.0210912	0.0424321	0.0730041	0.0938212	0.0888986	0.0405472
30	0.0294345	0.0625734	0.0531063	0.0958003	0.0768171	0.0788203	0.118389	0.0527933
31	0.152971	0.121528	0.0292835	0.0855861	0.0730244	0.0973475	0.0837045
32	0.72869	0.377474	0.111817	0.0918809	0.116065	0.127623	0.103752
33	0.588953	0.122204	0.0672849	0.0839559	0.0853719	0.110405	0.112693
34	0.62692	0.493305	0.192641	0.14848	0.0261964		0.132595
35	0.411701	0.645272	0.226652	0.0848286	0.110645	0.106014	0.0937171
36	0.705716	0.330737	0.307809	0.175021	0.110448	0.130957	0.125927
37	0.892881	0.73717	0.490572	0.1857	0.108899		0.0933143
38	0.884915	0.917523	0.431215	0.247335	0.0261964	0.145214	0.138657
39	0.852554	0.841996	0.720802	0.250509	0.181602	0.0872013	0.0984315
40	0.376584	0.347109	0.280368	0.17552	0.127238	0.0919997	0.0954081
41	0.545457	0.579808	0.295952	0.233569	0.15973	0.128036	0.146343
42	0.213492	0.152473	0.246144	0.29945	0.136611	0.12881
43	0.0417449	0.273454	0.348178	0.180398	0.182051	0.135175
44	0.627712	0.0914055	0.119589	0.221934	0.152544	0.156017
45	0.548759	0.14658	0.286966	0.120696	0.0261964	0.125353	0.115106
46	0.838161	0.268543	0.163349	0.0671429	0.127426	0.126352	0.124708
47	0.6795	0.328774	0.110414	0.122002	0.113903	0.090245
48	0.270321	0.0460548	0.036229	0.071737	0.0766076	0.0778401	0.0854959
49	0.0111026	0.125653	0.0778674	0.0881391	0.0661827	0.0702695	0.065313	0.0479454
50	0.68757	0.104531	0.0644057	0.112699	0.090844	0.0798428	0.0386143	0.0404167
51	0.878291	0.0538601	0.0282915	0.0582142	0.0600134	0.0425712	0.0383563	0.0478155	0.0252834
52	0.29737	0.117407	0.0312542	0.0659101	0.0261964	0.0565476	0.0543999	0.0348815	0.0232305
53	0.140518	0.0754244	0.0761901	0.0417647	0.0368968	0.0259215	0.0207542	0.0170007	0.0138667	0.0155824
54	0.873794	0.0654738	0.0546169	0.0403842	0.0144062	0.028785	0.0242176	0.0166307	0.0145685	0.0209632
55	0.0626194	0.0543706	0.072778	0.0183887	0.023153	0.0129422	0.0198153	0.0219954	0.0191431
56	0.213588	0.154098	0.0371386	0.017705	0.0196644	0.0289665	0.0301903	0.0692921
57	0.23229	0.0933147	0.0712372	0.0362451	0.0245601	0.0406851	0.0374945	0.0361855	0.0353717
58	0.497048	0.394479	0.0320093	0.045102	0.0494614	0.0414708	0.0392106	0.0499758
59	0.779595	0.0899069	0.0640236	0.05856	0.092365	0.0752339	0.0381476
60	0.859296	0.657765	0.191111	0.0652233	0.0603051	0.0523827	0.0748149	0.0692901
61	0.815988	0.464343	0.0325079	0.0336083	0.0623093	0.0707009	0.0551767	0.0552843
62	0.574167	0.291655	0.152453	0.0514198	0.0553237	0.0846558	0.0798719	0.0692921
63	0.151029	0.0500615	0.207961	0.116573	0.0261964	0.13886	0.0912894	0.0862308
64	0.0106249	0.02685	0.0666063	0.101935	0.108675	0.111152	0.0866355	0.0823188
65	0.338974	0.249385	0.0967748	0.124403	0.101869	0.089791	0.0794019	0.0648566
66	0.533713	0.18063	0.0283841	0.0557803	0.0724799	0.0560109	0.0477232	0.0476484
67	0.87015	0.160217	0.0760477	0.0594554	0.0366574	0.0530419	0.0375166	0.0385126
68	0	0.0178903	0.0673268	0.0539782	0.0236298	0.0201013	0.0297962	0.0287387	0.029319
69	0.0182126	0.0138699	0.0513891	0.0269588	0.0373581	0.04018	0.0368133	0.0306476
70	0.744625	0	0.00843771	0.00415291	0.0199889	0.0381528	0.0474296	0.0455789
71	0.958349	0.188299	0.0513333	0.0229093	0.0608953	0.0711646	0.0714855	0.0619712
72	0.0320365	0.137692	0.118111	0.0903114	0.0955638	0.0851843	0.0915203	0.0693931
73	0.735842	0.0149282	0.104073	0.144477	0.143414	0.104815	0.0939608	0.0586552
74	0.729244	0.194475	0.1546	0.0920987	0.089734	0.0996373	0.0827762	0.0642783
75	0.836884	0.395805	0.0624842	0.0781252	0.0588471	0.0653164	0.0613417	0.0508751	0.0300853
76	0.775389	0.0439016	0.0700601	0.044228	0.032365	0.020305	0.0259016	0.0339867	0.0310919
77	0.511435	0.0518381	0.0152576	0.0705798	0.0366706	0.0620087	0.0559983	0.0367966	0.0408406
78	0.130393	0.38434	0.105614	0.124748	0.0634766	0.074213	0.04544	0.0635757
79	0.684974	0.0530341	0.0787667	0.103693	0.0950611	0.0763349	0.0687651	0.0491433
80	0.438758	0.323736	0.039337	0.0643861	0.0575135	0.0633978	0.0504841	0.0437737	0.0365728
81	0.539393	0.0199676	0.0389216	0.036117	0.0196857	0.0284683	0.0332834	0.042138	0.0402289
82	0.539258	0.297336	0.100712	0.0650057	0.045937	0.0409113	0.0418181	0.0535128
83	0.617119	0.0369012	0.0909191	0.0498237	0.0844915	0.0936476	0.0617971	0.0894715
84	0.733515	0.162045	0.0649832	0.0887656	0.0362407	0.0451049	0.033577	0.0369166	0.0410554
85	0.337738	0.000289571	0.0444154	0.0753153	0.0632696	0.0688795	0.0699892	0.0404157	0.0539585
86	0.395241	0.214755	0.0306615	0.0603299	0.0492348	0.0420754	0.0399651	0.0304414	0.0411173
87	0.895523	0.0378245	0.0912321	0.0542652	0.0911757	0.0647097	0.0652578	0.0487244
88	0.147845	0.0671916	0.0838958	0.0302411	0.0212598	0.0165899	0.0421011	0.0378657	0.0373568
89	0.759685	0.189441	0.0753516	0.110438	0.0385635	0.0611586	0.0562299	0.0355037	0.0389574
90	0.254004	0.0412766	0.0249669	0.0471168	0.062282	0.0498976	0.0337244	0.0292945	0.034298
91	0.940713	0.157191	0.137314	0.0645605	0.0637741	0.0476429	0.0354493	0.030094	0.0451519
92	0.231265	0.262562	0.160412	0.0677306	0.0876494	0.0505958	0.0547056		0.0533387
93	0.0334534	0.426924	0.0482401	0.0806592	0.0704088	0.0748361	0.0638068	0.0412589	0.0454453
94	0.184472	0.184315	0.135869	0.141305	0.084516	0.0550195	0.0473223	0.0364588	0.0382997
95	0.371274	0.75099	0.100963	0.0490285	0.0469762	0.0533421	0.0318468	0.0361398	0.0399096
96	0.527408	0.420943	0.104447	0.0585863	0.0760723	0.0458783	0.0294738	0.0370138	0.0316361
97	0.349443	0.0154969	0.0547254	0.0288918	0.0431475	0.0388631	0.0443078	0.0340719	0.0422339
98	0.451881	0.538241	0.0481936	0.0814679	0.0558052	0.0437447	0.0373041	0.0355037	0.0370073
99	0.550015	0.103524	0.0918238	0.0486667	0.0611243	0.0483867	0.0514121	0.0527933	0.0385934
the mean of B	0.449002	0.181458	0.0924606	0.0686515	0.0566152	0.0574219	0.0530714	0.0435102	0.0277716	0.0162146

## Sheet: D=10 m
C=1.3 m	2.6	5.2	7.8	10.4	13	15.6	18.2	20.8	23.4	26
D=10 m	17.576	140.608	474.552	1124.86	2197	3796.42	6028.57	8998.91	12812.9	17576
V	2	4	6	8	10	12	14	16	18	20
1	5.77413	119.719	320.33	706.096	1792.48	2954.88	4732.26	6579	10890.4
2	5.37339	62.6646	142.005	752.242	1823.14	3279.96	5394.47	7790.47	10593.7
3	5.90306	10.6028	183.237	719.544	1925.82	3040.82	4610.19	7648.23	12008.2
4	4.46859	134.936	402.041	1029.22	1820.48	3309.19	5263.59	7548.39	12122.4
5	1.58615	49.2088	419.631	1018.6	1995.27	3550.43	5507.38	7961.11	12213.9
6	4.41943	140.456	440.176	925.03	2070.33	3274.93	5431.6	7905.01	12074.1
7	3.4863	136.402	428.697	1070	2069.69	3528.19	5620.09	8354.34	11914.5
8	2.12894	30.5689	362.114	930.409	1889.35	3501.69	5578.31	8024.74	12356.5
9	6.42001	46.3961	323.345	1006.01	2037.32	3151.62	5488.37	8264.34	12562
10	0.588928	65.9361	380.034	847.159	1868.8	3457.03	5741.13	8311.12	12482.9
11		134.287	388.599	907.824	1846.26	3162.04	5543.41	8059.1	12393.4
12	0.246106	43.727	355.122	915.559	1871.98	3316.67	5481.79	8272.93	12541.1
13	1.6657	74.1454	433.259	1029.25	1876.09	3350.79	5676.62	8664.1	12685.8
14	9.0351	38.2014	134.947	1019.97	1967.49	3495.3	5768.99	8536.31	12547
15	8.14109	60.0517	357.866	1078.27	2054.01	3670.6	5932.49	8759.19	12714.3
16	3.60279	76.4322	428.863	926.35	2076.49	3531.34	5770.4	8600.89	12595.7
17	4.078	81.4842	435.747	803.114	2067.87	3625	5761.27	8758.36	12458
18	12.0099	83.433	442.941	1021.87	1896.4	3651.81	5720.48	8610.1	12624.1
19	8.03281	44.3502	444.827	887.943	2011.79	3597.67	5938.23	8847.12	12518.1
20	3.3169	137.048	433.571	1113	2141.55	3700.64	5768.33	8747.25	12547.7
21	2.27932	126.371	413.658	1094.97	2147.18	3674.76	5856.12	8660.25	12328.5
22	2.85023	128.494	467.606	1068.56	2074.69	3717.12	5801.46	8562.94	12087.3
23				1121.48	2191.54	3595.54	5561.64	8302.75	12056.1
24	14.9264	138.463	460.791	1112.39	2159.12	3571.06	5476.67	8302.49	12004.6
25		139.247	452.039	1069.49	1966.25	3477.19	5470.5	8040.59	11595.3
26		112.032	349.661	1046.66	2148.69	3533.68	5171.59	7662.86	11285.2
27	9.31949	130.216	436.694	1101.14	1988.7	3419.01	5117.19	7683.85	11239.2
28	14.3683	95.1954	473.322	1085.6	2030.66	3154.15	4930.68	7282.26	11319.1
29		132.71	452.203	1093.31	1961.67	3134.79	4957.06	7486.04	10776.1
30		124.824	394.865	981.136	1802.93	2935.09	4684.16	6858.87	11130.7
31	6.02402	108.017	422.19	959.048	1730.92	2872.83	4169.4	6036.68	10586.5
32	6.41002	79.0346	332.051	799.32	1414.81	2505.8	4207.56		10765.7
33	8.30358	64.2858	300.621	823.614	1591.02	2808.9	4270.28	6477.65	11066.6
34	6.48547	38.147	139.494	510.852	1222.05	2389.66	4097.63		11167
35	0.862406	43.2558	149.632	593.029	1547.52	2106.98	3537.65	5590.86	11399.5
36	4.4951	7.73839	145.754	273.817	1348.51	2718.73	3781.71		11244.2
37	2.46215	2.25345	29.8287	77.6091	518.177	1583.46	3405.42		11034
38	0.099239	10.8764	26.5786	5.69457	410.595	2057.97	3457.9		11676.3
39	0.036294	13.5808	65.1717	145.529	52.9699	1613.74	3150.85	6084.95	11639.3
40	2.57636	109.493	117.032	256.121	577.833	766.697	2600.79	3108.27
41	10.5122	50.8824	271.877	94.2997	185.817	684.869	2040.69	631.639	10901.8
42	2.73977	49.8152	241.804	113.587	414.35	1469.28	1480.83	2858.87	10705.5
43	11.188	90.5009	134.586	429.679	921.564	682.571	1193.01		10549.8
44	7.17149	63.3336	214.501	261.917	615.721	1913.56	2920.76	3121.4	10172.7
45	6.77987	97.7516	256.267	454.973	426.03	1612.18	3107.2	4888.68	9925.79
46	2.12831	12.8391	40.0325	576.957	500.022	1528.38	2396.68	3245.23	10202.8
47	1.87166	51.6133	151.465	269.524	440.841	1249.6	3538.85	5766.3	10676.5
48	10.9876	62.3413	342.915	603.227	1540.89	1876.66	2589.38	5506.41	10597.9
49	3.70406	67.1948	195.913	207.991	763.315	2600.03	4606.88	6946.16	11186.6
50	4.01179	98.3513	318.874	692.815	1522.8	2614.76	4215.98	6707.56	10990.4
51	0.525589	66.4347	290.139	841.364	1754.1	2526.07	4796.76	7106.33	11509.2
52	4.79077	93.8967	448.456	911.332	1821.57	3205.82	5095.8	7305.8	11397.6
53	4.24265	98.5138	404.368	923.888	1842.33	3408.93	5310.14	8117.69	12183.9
54	2.78507	136.632	351.795	987.022	1807.82	3195.16	5398.92	7759.48	12264.9
55	0.142358	93.5414	364.94	894.879	1724.08	3468.35	5637.37	8325.82	12109.2
56	3.60414	21.9461	401.078	930.709	1866.26	3338.75	5417.23	8147.79	12160.9
57	13.2643	99.8279	275.315	760.938	1730.21	3039.86	4914.51	7919.74	11802.3
58	3.05569	4.33029	280.767	744.028	1752.76	2975.99	4903.38	7339.89	11553.4
59	2.45628	54.6785	321.342	832.051	1441.4	2592.93	4372.73	6929.54	11608.6
60	3.67653	7.28766	52.065	269.694	1063.96	1709.32	4013.23	6356.97	11088.9
61	2.45791	5.57444	286.187	517.728	1059.26	632.882	3612.87	6422.34	11166.7
62	2.67513	5.14559	247.366	429.011	1678	2562.35	2321.98	5357.79	11186
63	7.43678	131.195	368.328	741.637	1317.39	2022.64	2278.4	3795.04	10926.8
64		103.751	426.809	739.317	1029.01	2401.3	3439	5142.21	10100.8
65	6.40064	94.6513	347.758	838.683	1539.57	2632.07	3874.16	6573	10619.9
66	4.91331	114.677	332.662	661.331	1194.86	3062.01	4747.55	6853.58	11272.8
67	10.8665	34.0733	121.961	628.846	1619.11	3041.13	4585.05	7053.18	9916.34
68	17.4133	130.934	425.834	869.073	1598.18	3279.04	5174.6	7908.4	11650.6
69	7.37353	86.3161	429.213	946.089	1901.72	3437.88	5166.35	7566.96	11605.2
70	9.18131	50.5988	350.225	891.855	2027.96	3486.77	5227.09	7423.2	11491.7
71	0.689958	58.2996	359.142	986.056	1972.02	3104.14	4817.14	6655.12	11156.2
72	2.3057	42.9618	411.036	913.368	1692.33	2622.42	3645.66	6445.3	10662.6
73	6.00255	119.596	386.03	693.605	645.16	2087.29	3267.16	4680.09	10647.9
74	2.33342	11.8203	139.66	631.783	1538.38	2481.71	3930.63	4887.6
75	1.34942	15.8108	211.634	965.003	1652.24	2730.02	4509.4	6899.92	11484.5
76	5.57854	51.9613	213.21	829.869	1902.61	3313.21	4972.21	7434.63	11550.7
77	2.75477	41.4164	187.735	446.129	1897.47	3258.16	4900.65	7276	11824.3
78	1.02521	47.4489	235.518	891.716	1551.8	2330.9	4232.23	5894.81	11676.7
79	4.07223	106.186	378.754	772.444	1400.85	2466.23	4091.16	5617.63	9299.82
80	7.35554	72.7555	272.385	891.935	1654.42	3040.68	4500.05	6471.74	11148
81	1.11373	32.9254	219.937	850.463	1467.16	3071.87	5419.28	8204.85	11808.7
82	6.96503	18.0209	105.288	469.898	1073.12	2168.43	4904.01	7557.05	11697.7
83	9.24171	5.85366	312.787	814.037	1529.56	2515.95	3821.25	5411.23	10135.8
84	4.01288	16.694	339.804	455.195	1217.12	2147.3	4815.34	7556.84	10685.8
85	8.25284	97.5924	427.548	748.347	1043.75	2105.28	3835.7	4187.25	10990.1
86	5.91676	103.858	316.318	906.8	1531.07	2509.94	4541.22	7133.61	11392.2
87	9.36487	52.9135	240.518	722.285	1441.04	2563.21	4203.71	5108.11	10670.7
88	1.20229	65.4189	362.52	773.985	1920.95	3033.51	4739.36	6860.43	11493.6
89	3.14102	54.1822	202.134	647.664	1078.83	2534.85	4203.71	7138.01	11556.2
90	1.73944	103.972	310.992	849.765	1642.51	2854.87	4521.7	7232.32	11690.1
91	7.0119	37.865	184.134	696.238	1498.29	1728.37	4268.11	6760.2	11857.8
92	0.390919	45.5493	322.414	768.787	1672.49	2491.8	4239.53	6845.19	10961.6
93	0.932523	65.8486	179.167	1017.13	2046.23	3119.05	4392.53	6863.39	11233.3
94	7.716	46.6803	183.782	669.933	523.653	2296.99	4685.06	6311.17	11247.1
95	9.49283	18.1367	73.7728	312.502	1517.22	3097.03	5124.32	7293.1	11302.7
96	7.92639	20.9656	65.763	223.313	707.669	1186.6	3822.83	6430.72	11894.5
97	16.3798	123.717	396.619	990.39	1881.76	3128.13	4764.31	6824.63	11898.3
98	1.32876	14.1984	136.34	747.761	1569.57	2398.08	5078.88	7491.31	11323.1
99	6.87786	39.4948	225.962	826.4	1801.21	2627.17	3994.52	6808.77	10790.1
B	2	4	6	8	10	12	14	16	18	20
1	0.671477	0.148559	0.324985	0.372283	0.184122	0.221665	0.215028	0.268912	0.150045
2	0.694277	0.554332	0.70076	0.331259	0.17017	0.136038	0.105182	0.134287	0.173197
3	0.664141	0.924593	0.613873	0.360328	0.123432	0.199029	0.235277	0.150094	0.0628034
4	0.745756	0.0403359	0.152799	0.0850298	0.171379	0.128338	0.126892	0.161189	0.0538881
5	0.909755	0.650028	0.115733	0.0944684	0.0918222	0.0647955	0.0864526	0.115325	0.0467493
6	0.748553	0.00108056	0.0724381	0.177651	0.0576564	0.137363	0.0990236	0.121559	0.0576627
7	0.801644	0.0299153	0.0966278	0.0487725	0.0579462	0.0706512	0.0677563	0.0716275	0.0701157
8	0.878872	0.782595	0.236936	0.172869	0.140031	0.0776321	0.0746882	0.108254	0.0356207
9	0.634729	0.670032	0.31863	0.105659	0.0726798	0.169844	0.0896056	0.081629	0.0195808
10	0.966492	0.531064	0.199173	0.246879	0.149387	0.0893956	0.0476791	0.0764301	0.0257544
11	0	0.0449577	0.181124	0.192948	0.159643	0.167099	0.080476	0.104437	0.0327418
12	0.985998	0.689015	0.251668	0.186072	0.14794	0.126369	0.0906982	0.0806744	0.021214
13	0.905229	0.47268	0.0870142	0.0850019	0.146068	0.117382	0.0583807	0.0372063	0.00992255
14	0.485941	0.728313	0.715633	0.0932519	0.104464	0.0793164	0.0430572	0.0514062	0.02075
15	0.536806	0.572914	0.245886	0.0414203	0.065083	0.0331397	0.0159366	0.0266393	0.00769429
16	0.795017	0.456417	0.0962782	0.176478	0.05485	0.0698214	0.0428245	0.04423	0.0169553
17	0.767979	0.420487	0.0817719	0.286034	0.0587745	0.0451529	0.044338	0.0267315	0.0276988
18	0.316689	0.406627	0.0666132	0.0915613	0.136821	0.0380889	0.0511049	0.0432061	0.0147388
19	0.542967	0.684582	0.0626378	0.210622	0.0842992	0.0523519	0.0149851	0.0168678	0.0230062
20	0.811283	0.0253199	0.0863579	0.0105515	0.0252403	0.025229	0.0431669	0.0279661	0.0207012
21	0.870317	0.101251	0.128318	0.0265729	0.0226762	0.032044	0.0286044	0.0376339	0.0378085
22	0.837834	0.0861538	0.0146379	0.0500543	0.0556692	0.0208877	0.0376725	0.0484467	0.0566315
23	0	0	0	0.00300627	0.0024871	0.0529131	0.0774519	0.0773612	0.0590686
24	0.150748	0.0152527	0.0289982	0.0110868	0.0172394	0.059361	0.0915464	0.0773897	0.0630889
25	0	0.009678	0.0474411	0.0492315	0.105028	0.084086	0.0925709	0.106493	0.0950321
26	0	0.203229	0.263177	0.0695252	0.0219884	0.0692073	0.142152	0.148469	0.119228
27	0.46976	0.0739048	0.079777	0.0210902	0.0948128	0.0994117	0.151177	0.146136	0.122823
28	0.182505	0.322973	0.00259169	0.0349084	0.0757112	0.169177	0.182115	0.190762	0.11659
29	0	0.0561736	0.0470944	0.0280528	0.107115	0.174277	0.177739	0.168117	0.158966
30	0	0.112258	0.167921	0.127773	0.179368	0.226879	0.223006	0.237811	0.13129
31	0.657259	0.231784	0.110341	0.14741	0.212145	0.243279	0.308393	0.329176	0.173766
32	0.635297	0.437908	0.300285	0.289408	0.356026	0.339958	0.302063		0.159777
33	0.527562	0.542801	0.366517	0.26781	0.27582	0.260117	0.291659	0.280174	0.136292
34	0.631004	0.7287	0.70605	0.545854	0.443766	0.370548	0.320298		0.128455
35	0.950933	0.692366	0.684688	0.472799	0.295621	0.445008	0.413185	0.378718	0.110311
36	0.744248	0.944965	0.692859	0.756578	0.386203	0.283869	0.372702		0.122431
37	0.859914	0.983974	0.937143	0.931006	0.764143	0.582908	0.435119		0.138835
38	0.994354	0.922648	0.943992	0.994938	0.813111	0.457916	0.426415		0.0887111
39	0.997935	0.903413	0.862667	0.870625	0.97589	0.57493	0.477347	0.323813	0.0915964
40	0.853416	0.221288	0.753384	0.772309	0.73699	0.798047	0.568589	0.654595
41	0.401897	0.638126	0.427088	0.916168	0.915422	0.819601	0.661496	0.929809	0.149157
42	0.844119	0.645716	0.490458	0.899021	0.811402	0.612981	0.754364	0.682309	0.164473
43	0.363451	0.35636	0.716394	0.618017	0.580535	0.820207	0.802106		0.176628
44	0.591973	0.549573	0.547993	0.767157	0.719745	0.495957	0.515514	0.653136	0.206058
45	0.614254	0.304794	0.45998	0.595531	0.806085	0.575342	0.484587	0.456747	0.225329
46	0.878908	0.908689	0.915641	0.487087	0.772407	0.597414	0.602445	0.639375	0.203712
47	0.893511	0.632928	0.680824	0.760394	0.799344	0.670848	0.412987	0.359223	0.166742
48	0.37485	0.556631	0.277391	0.463734	0.298638	0.505676	0.570482	0.388103	0.172871
49	0.789255	0.522112	0.587163	0.815097	0.652565	0.315135	0.235825	0.228111	0.126929
50	0.771746	0.300529	0.328052	0.38409	0.306872	0.311255	0.300667	0.254625	0.14224
51	0.970096	0.527518	0.388604	0.252031	0.201593	0.334618	0.204329	0.210312	0.101746
52	0.727426	0.33221	0.0549904	0.189829	0.170883	0.155568	0.154725	0.188146	0.11046
53	0.758611	0.299373	0.147896	0.178667	0.161432	0.102066	0.11917	0.0979256	0.0490882
54	0.841541	0.0282786	0.258681	0.122541	0.17714	0.158375	0.104444	0.137731	0.0427671
55	0.9919	0.334736	0.23098	0.204456	0.215256	0.0864146	0.0648913	0.0747974	0.0549186
56	0.79494	0.84392	0.154828	0.172603	0.150541	0.120552	0.101407	0.0945801	0.0508835
57	0.245319	0.290027	0.419842	0.323529	0.212466	0.199281	0.184797	0.119922	0.0788727
58	0.826144	0.969203	0.408353	0.338562	0.202201	0.216106	0.186643	0.184358	0.0982984
59	0.860248	0.611128	0.322851	0.26031	0.343922	0.317006	0.274665	0.229959	0.0939952
60	0.790821	0.94817	0.890286	0.760243	0.515723	0.549754	0.334297	0.293585	0.134555
61	0.860155	0.960355	0.396933	0.539742	0.517861	0.833295	0.400709	0.286321	0.128481
62	0.847796	0.963405	0.478739	0.618611	0.236231	0.325061	0.614837	0.404618	0.126975
63	0.576879	0.0669467	0.223841	0.340688	0.400368	0.467224	0.622067	0.578278	0.147202
64	0	0.262129	0.100607	0.34275	0.53163	0.367483	0.429549	0.428574	0.211669
65	0.635831	0.326843	0.267186	0.254414	0.299238	0.306696	0.357366	0.269578	0.171159
66	0.720454	0.184419	0.298998	0.412079	0.456141	0.193447	0.212492	0.238399	0.1202
67	0.381742	0.757672	0.742997	0.440959	0.263034	0.198948	0.239446	0.216219	0.226067
68	0.00925899	0.0687991	0.102661	0.227397	0.272564	0.136281	0.141654	0.121183	0.0907127
69	0.580478	0.386122	0.0955411	0.15893	0.134404	0.0944395	0.143022	0.159125	0.0942562
70	0.477622	0.640143	0.261988	0.207144	0.0769435	0.0815614	0.132947	0.1751	0.103112
71	0.960744	0.585375	0.243197	0.1234	0.102401	0.182349	0.200948	0.260453	0.129296
72	0.868815	0.694457	0.133843	0.188019	0.229709	0.309237	0.39527	0.283769	0.167826
73	0.658481	0.149438	0.186537	0.383388	0.706345	0.450194	0.458053	0.479927	0.168969
74	0.867239	0.915935	0.705702	0.438347	0.299782	0.346303	0.348	0.456867
75	0.923224	0.887554	0.554035	0.142116	0.247958	0.280897	0.251995	0.23325	0.103678
76	0.682605	0.630453	0.550713	0.26225	0.133998	0.127278	0.175225	0.17383	0.0985129
77	0.843265	0.705448	0.604396	0.603393	0.136336	0.141779	0.187095	0.191458	0.0771545
78	0.94167	0.662545	0.503705	0.207268	0.293673	0.386027	0.29797	0.344942	0.088674
79	0.768308	0.244806	0.201871	0.3133	0.362383	0.350378	0.321372	0.375743	0.274183
80	0.581501	0.482565	0.426016	0.207073	0.246963	0.199066	0.253546	0.280831	0.129943
81	0.936633	0.765836	0.536538	0.243941	0.332198	0.190849	0.101067	0.0882401	0.0783716
82	0.603719	0.871836	0.778132	0.582262	0.511552	0.428821	0.186538	0.160226	0.0870399
83	0.474186	0.958369	0.340879	0.276324	0.303797	0.337283	0.366143	0.39868	0.208937
84	0.771684	0.881272	0.283948	0.595333	0.446008	0.434388	0.201247	0.16025	0.166009
85	0.530448	0.305926	0.0990491	0.334722	0.524921	0.445456	0.363746	0.534694	0.142262
86	0.663361	0.261364	0.333439	0.193858	0.303107	0.338867	0.246717	0.207281	0.110883
87	0.467179	0.623681	0.493169	0.357891	0.344089	0.324835	0.302701	0.432363	0.167194
88	0.931595	0.534743	0.236081	0.31193	0.125648	0.200954	0.213849	0.237638	0.102964
89	0.821289	0.614658	0.574052	0.424229	0.508952	0.332304	0.302701	0.206792	0.0980803
90	0.901033	0.260552	0.344663	0.244562	0.252385	0.24801	0.249954	0.196312	0.0876331
91	0.601052	0.730705	0.611984	0.381047	0.31803	0.544738	0.29202	0.248776	0.0745407
92	0.977758	0.676055	0.320593	0.316551	0.238737	0.343645	0.296761	0.239331	0.144486
93	0.946943	0.531687	0.62245	0.0957721	0.0686254	0.178423	0.271381	0.237309	0.12328
94	0.560992	0.668011	0.612725	0.404432	0.761651	0.394958	0.222857	0.298674	0.122207
95	0.459898	0.871013	0.844542	0.722187	0.309412	0.184223	0.149994	0.189557	0.117866
96	0.549022	0.850893	0.861421	0.801475	0.677893	0.687443	0.365881	0.285389	0.071675
97	0.0680583	0.120126	0.164224	0.119546	0.143485	0.17603	0.209712	0.241617	0.0713819
98	0.924399	0.899021	0.712698	0.335244	0.285587	0.368329	0.157532	0.167532	0.116272
99	0.608679	0.719114	0.523841	0.265333	0.180148	0.307986	0.337402	0.243378	0.157873
the mean of B	0.651936	0.502473	0.373001	0.330971	0.300424	0.27882	0.250949	0.235581	0.107817

## Sheet: D=15 m
C=1.3 m	2.6	5.2	7.8	10.4	13	15.6	18.2	20.8	23.4	26
D=15 m	17.576	140.608	474.552	1124.86	2197	3796.42	6028.57	8998.91	12812.9	17576
V	2	4	6	8	10	12	14	16	18	20
1	6.65841	53.824	234.708	665.087	1018.44	209.218	873.787	2460.47	3852.65	1733.13
2	5.0978	7.7794	103.239	258.051	589.878	600.087	783.453	1388.51	3593.81	6168.28
3	1.28657	12.3049	81.9413	67.7237	789.311	1300.74	751.305	939.247	1246.63	4516.38
4	2.59437	121.36	402.737	683.136	996.844	792.632	830.841	5303.33	6796.17	5547.4
5	12.6193	91.7855	421.683	468.237	1444.84	2348.01	3590.46	5384.24	5592.35	11274.6
6	0.312748		471.013	1003.81	1953.2	2492.34	3786.18	6331.24	9386.85	10409
7	13.8661	69.2102	131.04	469.609	1434.59	2191.11	3217.35	6215.83	7366.76	10408.8
8	2.66529	65.0127	116.866	535.077	952.538	1024.23	2639.65	5370.51	3852.65	9413.32
9	2.65955	45.6711	189.105	765.446	1623.26	1406.55	3310.64	5864.24	7156.38	11118
10	4.84845	31.1411	126.612	111.344	917.801	1710.26	2732.26	5197.45	7200.68	9010.82
11	14.9646	59.4382	216.096	347.423	1359.91	2399.61	3086.36	6366.6	8120.49	11991.8
12	2.36778	18.4734	122.994	457.053	1341.07	1175.75	2326.62	6278.26	3852.65	12693.2
13	10.0182	37.0904	338.242	986.575	1241.59	2495.66	4216.51	6958.19	9512.42	13574.2
14	0.544479	0.893418	121.531	141.062	568.234	1960.98	1416.04	6460.22	9454.55	12346.1
15	3.50441	13.6361	124.102	743.772	1399.13	2535.07	4512.7	8192.9	11211.5	14600.8
16	5.11471		159.921	696.765	1074.32	3222.35	5143.49	7070.39	10781.2	14601.2
17	1.89498	22.5229	96.9076	587.512	1225.2	2644.92	5437.27	7958.42	11398.4	13794.3
18	1.30589	38.2846	365.907	658.391	1616.47	2627.14	4999.59	7892.44	10766.8	13193.3
19	0.438782	29.0459	190.305	625.284	830.365	2332.19	5515.73	8290.45	12252.8	13143.8
20	0.079534	23.2995	49.3829	938.923	1329.93	2680.46	5428.84	8013.37	11881.9	13858
21	1.77569	110.041	410.407	891.719	707.286	2747.39	5069.17	8151.23	11251.9	12905.9
22	0.271871	139.947	467.102	1043.08	2051.05	3439.64	5375.53	8263.41	11290.3	1733.13
23			469.446	1063.45	1971.47	3599	5424.28	8043.58	11024.9	13536.5
24	15.8062	95.6918	152.825	1070.52	1883.66	3243.31	5135.85	7634.07	11317.3	14096.7
25			457.137	962.001	1792.79	3215.91	4924.07	6908.79	3852.65	error from blockfracture
26		112.053	341.522	743.401	1197.91	3087.51	4925.08	7197.75	9808	12823.8
27	12.071		439.535	1002.61	1475.73	2864.91	4736.34	6996.82	10216.3	error from blockfracture
28	16.8372	139.962	321.989	852.056	1549.58	3152.63	4746.03	6321.21	9190	10845.5
29	0.429197	131.62	452.701	860.877	1482	2670.6	3763.61	6213.16	9060.92	12124.5
30	12.9856	117.53	392.841	733.99	1170.75	2393.94	3896.77	5272.06	8277.81	12142.6
31	7.47969	34.599	308.497	429.805	930.092	1822.85	1964.03	4763.65	6723.31	11250.5
32	0.70048	24.3977	275.544	607.28	687.143	1038.09	2455.81	4374.61	5354.85	11267.4
33	4.1573	35.0597	196.039	454.867	552.457	1895.18	3228	4393.83	6688.94	11691.9
34	2.89208	2.69775	62.2723	90.4201	294.995	485.948	1773.22	2460.47		10197.3
35	0.734748	3.98279	3.18463	131.173	199.425	151.664	401.9	2460.47		8931.77
36	0.51815	20.6609	142.593	58.5232	316.008	435.133	417.508	2460.47		9057.08
37	0.249829	0.756935	2.33143	32.3513	41.1534	33.7659	660.189	473.636		9527.58
38	1.36221	13.7556	7.91926	9.92096	48.2989	134.82	211.17	713.893		8759.35
39	1.95454	39.8179	59.4224	16.6581	10.4349	81.5822	102.561	141.16		7017.12
40	0.425313	15.7273	30.8918	76.7997	235.567	74.9033	126.416	171.486		8517.34
41	0.347924	85.2748	36.7402	77.9449	213.501	148.787	299.102	316.629
42	2.75241	17.6532	37.3229	113.991	131.649	384.735	279.445	228.096
43	0.493848	23.3514	61.4287	14.7525	430.542	379.817	114.934	186.736
44	3.38976	36.101	7.01442	40.4406	103.303	113.257	291.658	578.459
45	5.87282	7.29341	26.7792	52.9518	140.759	53.3494	1042.22	851.577		3754.52
46	3.83413	7.91945	36.2147	199.263	120.028	175.316	155.797	517.539	304.618	1550.42
47	0.068236	8.02007	35.3056	76.0023	133.313	121.832	189.017	886.314	1098.4	1397.19
48	4.41979	65.438	131.876	64.6504	110.732	622.72	1360.49	1636.96	2293.6	3842.06
49	10.7867	7.27328	39.4281	33.3489	241.217	455.282	1587.21	1281.29	2818.7	4863.11
50	4.71568	60.501	138.936	352.519	826.687	1515.43	1913.27	4116.42	4848.39	2136.5
51	2.01789	13.3195	126.929	281.565	278.672	427.778	1445.06	1054.98	1075.42	5505.85
52	6.62159	104.833	282.771	484.644	1032.29	1698.94	2918	5076.79	7065.52	7505.49
53	3.22172	29.2443	265.781	802.174	1069.74	868.005	2947.37	4952.54	4384.27	8459.33
54	0.694883	48.2139	162.061	476.971	868.646	1733.37	2288.44	4732.94	4296.71	7832.75
55	2.36123	54.0193	95.4622	208.002	479.359	1011.57	4560.81	6820.71	8924.79	9280.92
56	11.6035	27.7647	292.416	768.69	1575.05	2323.06	3115.44	2507.58	9283.66	10926.7
57	13.2088	38.5147	101.303	272.022	510.674	668.542	606.582	3876.52	6404.05	8663.27
58	3.79125	7.4275	72.4293	57.0333	637.399	1586.24	2235.75	4572.84	6064.02	9484.11
59	2.33963	2.40071	71.1613	187.893	270.608	109.82	1368.87	2246.16	4033.77	7291.42
60	4.31807	10.8093	38.1639	29.116	326.68	580.996	493.041	416.474	465.2	6835.18
61	2.27975	27.9777	69.9815	54.2914	18.8243	112.977	193.461	228.847	653.434	1353.32
62	5.09249	2.14536	44.5311	63.5914	384.819	417.903	270.561	713.492	2430.56	837.389
63	1.61122	110.665	399.157	515.74	1018.44	1431.13	440.992	1215.42		1381.61
64	15.1333	128.234	259.214	584.475	996.213	1270.27	383.998	1279.72	1606.02	2428.13
65	4.5061	48.8753	274.142	389.255	628.517	217.922	257.163	757.941	3347.42	856.543
66	1.20952	53.9378	110.984	50.8626	390.426	578.131	744.585	2119.35	2625.43	2088.82
67	13.9741	21.9268	125.419	139.502	362.55	574.24	2699.45	2738.84	3498.59	6660.67
68	15.6131	117.425	352.895	256.247	305.073	1237.25	2920.67	4909.78	5837.81	8218.76
69	1.84712	126.283	297.329	1048.91	1159.88	1972.61	3328.63	5209.02	7819.14	7592.35
70	6.73721	31.3589	117.626	601.823	1152.39	2050.02	4438.18	5279.65	6768.46	11645.7
71	10.0545	68.4216	195.835	620.684	1163.27	1493.98	3625.24	2455.22	3852.65	7457.87
72	4.2078	47.5626	297.399	666.105	795.438	485.271	760.593	897.425	1268.45	1733.13
73	10.1084	80.7271	85.87	61.422	71.421	417.725	1685.6	722.955	705.573	5673.04
74	0.464239	16.2273	41.7035	74.3142	205.116	265.086	2784.73	547.35	1674.49	3046.08
75	2.20714	19.9395	189.428	363.814	414.966	1858.47	3120.6	2072.45	3967.2	7660.79
76	6.1238	68.3634	127.573	405.258	343.387	1416.97	1992.99	1726.36	2347.21	4469.74
77	1.54914	7.17678	49.1794	182.754	183.796	1472.78	3964.66	3627.42	7138.99	1733.13
78	2.89951	47.7372	85.3553	120.804	588.468	178.015	868.648	1547.18	3470.87	4422.02
79	1.75159	42.5289	123.404	356.426	129.46	1110.28	1808.49	2996.96	3922.31	2045.66
80	1.65322	10.3982	91.556	384.722	902.722	2001.93	1742.3	1105.88	1123.72	3438.88
81	10.1821	27.8269	102.236	161.121	104.882	607.294	1933.87	3728.89	7522.19	6535.91
82	2.70383	10.7492	66.3823	153.92	352.67	246.028	990.932	2113.87	1572.23	3128.28
83	10.2238	30.5309	130.825	171.337	653.839	790.043	1548.27	1770.91	1643.38	2073.55
84	1.25188	33.2222	107.167	110.471	290.362	619.477	1698.32	2350.49	3573.49	5706.42
85	9.85464	74.8946	228.973	485.607	196.502	1276.07	1221.15	too many polygons	873.534	6600.34
86	4.34019	110.55	240.832	473.484	1092.34	788.555	1635.33	3945.14	4634.39	2079.93
87	2.94099	4.85906	3.10983	127.144	1057.55	500.233	1965.67	1810.62	1899.94	2181.47
88	3.96187	89.2578	238.835	638.734	1057.55	1190.53	2391.68	2801.13	5737.44	1569.58
89	5.86477	53.7042	86.8099	196.334	296.38	760.755	527.744	511.811	3852.65	1733.13
90	8.78883	2.70447	186.094	239.107	228.534	458.769	641.565	291.494	2455.89	4946.39
91	12.755	65.9305	157.874	38.0982	151.364	312.242	1196.09	1915.71	3852.65	6782.29
92	2.28741	72.2185	135.707	572.713	1150	1416.97	454.214	305.791	1429.38	1733.13
93	2.33356	23.6854	90.401	246.414	1445.87	1386.25	2116.32	1292.94	5545.63	4035.69
94	2.0029	13.6796	30.534	79.4229	144.011	565.211	994.121	995.203	789.563	1733.13
95	0.02652	9.18132	48.7193	112.823	434.291	618.308	1754.58	2850.08	2232.49	1733.13
96	2.89416	6.80658	33.9631	50.0145	169.186	139.455	703.554	614.543	663.479	2923.14
97	3.9396	108.696	210.7	636.014	1468.83	687.919	1439.03	too many polygons	2530.47	3062.87
98	0.635521	11.9338	30.2596	37.2208	352.084	1420.2	2020.58	4031.29	5630.12	error from blockfracture
99	0.617155	4.95455	43.9546	126.049	568.281	695.946	1379.04	1661.19	2989.62	1733.13
B	2	4	6	8	10	12	14	16	18	20
1	0.621164	0.617205	0.505411	0.40874	0.536442	0.944891	0.855059	0.726582	0.699315	0.901392
2	0.709957	0.944673	0.782449	0.770593	0.731508	0.841933	0.870043	0.845702	0.719516	0.649051
3	0.926799	0.912488	0.827329	0.939794	0.640732	0.657377	0.875376	0.895627	0.902705	0.743037
4	0.852392	0.136888	0.151332	0.392695	0.54627	0.791216	0.862183	0.41067	0.469584	0.684376
5	0.282017	0.347224	0.111409	0.583739	0.342356	0.38152	0.404425	0.401679	0.563538	0.358522
6	0.982206	0	0.00745858	0.107616	0.110969	0.343503	0.37196	0.296444	0.267391	0.407772
7	0.211078	0.507779	0.723866	0.582519	0.347022	0.422847	0.466316	0.309269	0.425051	0.407781
8	0.848356	0.537631	0.753734	0.524319	0.566437	0.730211	0.562144	0.403204	0.699315	0.464422
9	0.848683	0.675189	0.601509	0.319522	0.261145	0.629507	0.450842	0.348339	0.441471	0.367434
10	0.724144	0.778526	0.733196	0.901016	0.582248	0.549506	0.546781	0.422436	0.438013	0.487323
11	0.148578	0.577277	0.544632	0.691142	0.381015	0.367926	0.488045	0.292514	0.366225	0.317719
12	0.865283	0.868617	0.74082	0.593682	0.389588	0.690299	0.614068	0.302331	0.699315	0.277811
13	0.430009	0.736214	0.287239	0.122939	0.434869	0.342626	0.300579	0.226775	0.25759	0.227687
14	0.969021	0.993646	0.743904	0.874596	0.741359	0.483466	0.765112	0.282111	0.262107	0.297558
15	0.800614	0.903021	0.738487	0.338789	0.363162	0.332248	0.251447	0.0895675	0.124987	0.169273
16	0.708995	0	0.663007	0.380578	0.511005	0.151212	0.146813	0.214306	0.158566	0.169252
17	0.892184	0.839818	0.795791	0.477704	0.442331	0.303311	0.098082	0.115624	0.1104	0.215163
18	0.9257	0.727721	0.228941	0.414692	0.264238	0.307994	0.170684	0.122957	0.159691	0.249357
19	0.975035	0.793427	0.598979	0.444125	0.622046	0.385687	0.0850682	0.0787274	0.043717	0.252175
20	0.995475	0.834295	0.895938	0.165301	0.39466	0.29395	0.0994816	0.109518	0.0726631	0.211541
21	0.898971	0.217392	0.135169	0.207265	0.678067	0.276321	0.159141	0.0941985	0.121831	0.265709
22	0.984532	0.00469782	0.0156989	0.0727099	0.0664314	0.0939771	0.108323	0.0817328	0.118831	0.901392
23	0	0	0.0107595	0.0545987	0.102653	0.0520004	0.100238	0.10616	0.139551	0.22983
24	0.100692	0.319442	0.67796	0.0483142	0.142622	0.145691	0.148082	0.151668	0.116729	0.197956
25	0	0	0.0366983	0.144784	0.183982	0.15291	0.183211	0.232264	0.699315
26	0	0.203081	0.280328	0.339119	0.454753	0.18673	0.183043	0.200154	0.234522	0.270378
27	0.313211	0	0.0737887	0.108686	0.328298	0.245366	0.21435	0.222482	0.202658
28	0.0420369	0.00459731	0.321488	0.242526	0.294685	0.169578	0.212744	0.297559	0.282754	0.382936
29	0.975581	0.0639224	0.0460461	0.234684	0.325443	0.296547	0.375705	0.309565	0.292828	0.310167
30	0.261172	0.164133	0.172186	0.347486	0.467116	0.369421	0.353615	0.414145	0.353948	0.30914
31	0.574437	0.753933	0.349919	0.617905	0.576653	0.51985	0.674213	0.470642	0.475271	0.359894
32	0.960146	0.826484	0.41936	0.46013	0.687236	0.726562	0.592638	0.513874	0.582074	0.358935
33	0.763467	0.750656	0.586897	0.595625	0.74854	0.500798	0.464549	0.511738	0.477953	0.334778
34	0.835453	0.980814	0.868777	0.919617	0.865728	0.871998	0.705864	0.726582		0.419818
35	0.958196	0.971674	0.993289	0.883388	0.909228	0.960051	0.933334	0.726582		0.49182
36	0.970519	0.85306	0.699521	0.947973	0.856164	0.885383	0.930745	0.726582		0.484691
37	0.985786	0.994617	0.995087	0.97124	0.981268	0.991106	0.89049	0.947367		0.457921
38	0.922496	0.902171	0.983312	0.99118	0.978016	0.964488	0.964972	0.920669		0.50163
39	0.888795	0.716816	0.874782	0.985191	0.99525	0.978511	0.982988	0.984314		0.600755
40	0.975801	0.888148	0.934903	0.931725	0.892778	0.98027	0.979031	0.980944		0.515399
41	0.980205	0.393528	0.922579	0.930707	0.902822	0.960808	0.950386	0.964815
42	0.8434	0.874451	0.921351	0.898662	0.940078	0.898658	0.953647	0.974653
43	0.971902	0.833926	0.870554	0.986885	0.804032	0.899954	0.980935	0.979249
44	0.807137	0.743251	0.985219	0.964048	0.95298	0.970167	0.951621	0.935719
45	0.665861	0.948129	0.943569	0.952926	0.935931	0.985947	0.82712	0.905369		0.786384
46	0.781854	0.943677	0.923687	0.822856	0.945368	0.953821	0.974157	0.942489	0.976226	0.911788
47	0.996118	0.942962	0.925602	0.932434	0.93932	0.967909	0.968646	0.901509	0.914274	0.920506
48	0.748533	0.534607	0.722105	0.942526	0.949599	0.835972	0.774327	0.818093	0.820993	0.781403
49	0.386281	0.948273	0.916915	0.970353	0.890206	0.880076	0.736719	0.857617	0.780011	0.72331
50	0.731698	0.569718	0.707227	0.686612	0.62372	0.600825	0.682633	0.542565	0.621601	0.878442
51	0.885191	0.905272	0.732528	0.749689	0.873158	0.887321	0.760299	0.882766	0.916068	0.68674
52	0.62326	0.254431	0.404131	0.569153	0.530138	0.552489	0.515972	0.435844	0.448562	0.57297
53	0.816698	0.792015	0.439933	0.286871	0.513089	0.771362	0.5111	0.449651	0.657824	0.5187
54	0.960464	0.657104	0.658497	0.575975	0.604622	0.543419	0.620401	0.474054	0.664657	0.55435
55	0.865656	0.615816	0.798837	0.815087	0.781812	0.733546	0.243468	0.242052	0.303453	0.471955
56	0.339811	0.802539	0.383805	0.316637	0.28309	0.388091	0.48322	0.721347	0.275445	0.378317
57	0.248476	0.726085	0.786529	0.758174	0.767559	0.823902	0.899382	0.569224	0.500187	0.507097
58	0.784294	0.947176	0.847373	0.949298	0.709878	0.582174	0.62914	0.491845	0.526726	0.460394
59	0.866885	0.982926	0.850045	0.832964	0.876828	0.971073	0.772936	0.750397	0.685179	0.585149
60	0.75432	0.923124	0.919579	0.974116	0.851306	0.846962	0.918216	0.95372	0.963693	0.611107
61	0.870292	0.801024	0.852531	0.951735	0.991432	0.970241	0.967909	0.974569	0.949002	0.923002
62	0.710259	0.984742	0.906162	0.943467	0.824843	0.889922	0.95512	0.920714	0.810304	0.952356
63	0.908328	0.212953	0.158877	0.541509	0.536442	0.62303	0.92685	0.864937		0.921392
64	0.138977	0.0880049	0.453771	0.480404	0.546558	0.665402	0.936304	0.857792	0.874656	0.86185
65	0.743622	0.6524	0.422314	0.653954	0.71392	0.942598	0.957343	0.915774	0.738746	0.951266
66	0.931184	0.616396	0.766128	0.954783	0.822291	0.847717	0.876491	0.764488	0.795095	0.881155
67	0.204933	0.844057	0.73571	0.875983	0.83498	0.848741	0.552223	0.695647	0.726948	0.621036
68	0.111679	0.164874	0.256362	0.772198	0.861141	0.674101	0.515528	0.454403	0.54438	0.532387
69	0.894907	0.101879	0.373454	0.0675269	0.472064	0.480403	0.447858	0.42115	0.389745	0.568027
70	0.616681	0.776976	0.752133	0.464982	0.475471	0.460013	0.263809	0.413302	0.471746	0.337407
71	0.427942	0.513388	0.587327	0.448214	0.47052	0.606477	0.398656	0.727165	0.699315	0.575679
72	0.760594	0.661736	0.373306	0.407835	0.637944	0.872176	0.873835	0.900274	0.901002	0.901392
73	0.424874	0.425871	0.81905	0.945396	0.967492	0.889968	0.720398	0.919662	0.944933	0.677228
74	0.973587	0.884592	0.91212	0.933935	0.906638	0.930175	0.538077	0.939176	0.869312	0.826691
75	0.874423	0.858191	0.600828	0.676571	0.811121	0.510468	0.482365	0.7697	0.690375	0.564133
76	0.651582	0.513801	0.731172	0.639727	0.843702	0.62676	0.669409	0.808159	0.816809	0.745691
77	0.91186	0.948959	0.896367	0.837532	0.916342	0.612059	0.342355	0.596905	0.442828	0.901392
78	0.83503	0.660495	0.820135	0.892606	0.732149	0.95311	0.855911	0.82807	0.729111	0.748406
79	0.900342	0.697536	0.739956	0.683138	0.941074	0.707544	0.700013	0.666964	0.693878	0.88361
80	0.905938	0.926048	0.807069	0.657984	0.589112	0.472678	0.710993	0.87711	0.912298	0.804342
81	0.420683	0.802096	0.784563	0.856764	0.952261	0.840035	0.679215	0.585629	0.412921	0.628134
82	0.846164	0.923552	0.860116	0.863166	0.839477	0.935195	0.835627	0.765098	0.877293	0.822014
83	0.418307	0.782865	0.72432	0.847682	0.702395	0.791898	0.743178	0.803209	0.871741	0.882024
84	0.928774	0.763725	0.774173	0.901792	0.867837	0.836826	0.718289	0.738803	0.721102	0.675329
85	0.439313	0.467352	0.517497	0.568298	0.910559	0.663875	0.797439	1	0.931824	0.624469
86	0.753061	0.213772	0.492506	0.579074	0.502804	0.79229	0.728737	0.561599	0.638303	0.881661
87	0.83267	0.965443	0.993447	0.88697	0.518641	0.868235	0.673941	0.798796	0.851716	0.875883
88	0.774586	0.365201	0.496714	0.432167	0.518641	0.686407	0.603276	0.688725	0.552214	0.910697
89	0.66632	0.618057	0.81707	0.82546	0.865098	0.799612	0.912459	0.943125	0.699315	0.901392
90	0.499953	0.980766	0.607853	0.787435	0.895979	0.879157	0.893579	0.967608	0.808327	0.718571
91	0.274292	0.531104	0.667319	0.966131	0.931104	0.917754	0.801596	0.787118	0.699315	0.614116
92	0.869856	0.486384	0.714031	0.49086	0.476561	0.626762	0.924656	0.966019	0.888442	0.901392
93	0.867231	0.83155	0.809502	0.780939	0.341888	0.634852	0.648951	0.856323	0.567184	0.770386
94	0.886044	0.902711	0.935657	0.929393	0.934451	0.85112	0.835098	0.889409	0.938378	0.901392
95	0.998491	0.934703	0.897336	0.899701	0.802325	0.837134	0.708956	0.683286	0.825762	0.901392
96	0.835335	0.951592	0.928431	0.955537	0.922992	0.963267	0.883297	0.931709	0.948218	0.833685
97	0.775853	0.226958	0.556003	0.434586	0.331438	0.818798	0.761297	1	0.802506	0.825736
98	0.963842	0.915127	0.936236	0.966911	0.839743	0.62591	0.664833	0.552025	0.56059
99	0.964886	0.964763	0.907377	0.887943	0.741338	0.816683	0.77125	0.815401	0.766671	0.901392		B
the mean of B	0.707068	0.642908	0.646024	0.653985	0.658693	0.668108	0.635083	0.625822	0.586007	0.601614

## Sheet: D=20 m
C=1.3 m	2	4	6	8	10	12	14	16	18	20
D=20 m	2.6	5.2	7.8	10.4	13	15.6	18.2	20.8	23.4	26
V	17.576	140.608	474.552	1124.86	2197	3796.42	6028.57	8998.91	12812.9	17576
1	12.0489	69.3892	33.8542	190.756	469.778	427.694	264.666	390.995	2486.44	1142.99
2	0.834505	42.5325	117.303	183.77	311.236	179.864	676.724	405.041	862.353	190.778
3	0.752493	3.07119	13.7527	82.6288	321.756	282.11	1069.42	147.435	750.919	509.652
4	0.933421	79.9991	277.468	657.501	243.215	367.645	869.224	1662.41	1819.08	1970.43
5	2.1735	50.7947	268.488	578.461	932.666	890.778	2410.32	3210.03	3890.05	2423.78
6		121.304	263.206	987.044	1966.27	2085.91	3146.4	5494.57	7597.96	11083.1
7	14.5481	39.4526	233.704	310.246	1208.78	1568.56	1988.96	4755.86	5541.54	7637.42
8	1.05478	75.9809	152.276	96.8943	307.21	729.641	1615.23	2875.61	4476.99	1380.66
9	11.0603	60.0407	220.753	367.655	152.808	483.218	1974.23	1690.45	2900.06	4341.15
10	4.99202	44.5172	92.1083	161.58	276.873	670.64	3147.86	1883.45	1877.06	4870.51
11	1.83128	77.2916	253.651	129.925	941.366	1423.49	1935.12	4214.94	5650.36	4372.65
12	0.487911	4.39315	161.888	420.62	412.77	416.781	3017.87	1239.03	2911.42	4082.8
13	13.6244	6.54538	64.2048	996.807	407.309	1677.02	4156.35	1303.87	5446.58	6992.04
14	4.34164	1.67048	86.0489	54.3344	148.801	335.882	3262.86	1694.15	3424.29	4847.93
15	0.798476	15.9794	48.4963	569.147	337.54	474.9	4692.45	4901.56	3511.93	6559.56
16	5.62023	27.0886	46.7561	290.374	880.421	1687.72	3406.06	4642.78	9242.98	11913
17	0.646613	4.09903	11.838	127.427	691.175	2142.77	4963.79	4508.02	5742.73	9047.7
18	0.668491	6.08032	71.6366	145.33	262.841	1958.83	4901.59	6110.99	8182.48	12693.6
19	0.066878	17.1202	41.1027	254.377	262.722	476.383	2982.46	3520.39	10429.9	13642.3
20	1.54137	0.154919	16.8089	118.569	613.971	1803.8	4111.08	5737.17	10201.7	14508.6
21	11.9366	4.07421	120.288	300.1	526.938	2556.48	5052.21	5607.39	8793.39	13694.6
22			75.142	264.651	1571.85	3279.56	4252.66	7066.84	9338.51	14339.3
23		136.727		1057.28	1767.22	3523.4	5477.75	8063.07	9441.18	12693.6
24		25.4641	286.486	707.52	798.358	1279.88	4594.88	7059.79	10463.6	14136.6
25	3.81423	90.7192	274.544	829.22	1166.54	2867.7	3597.27	6205.97	9758.36	12630.6
26	12.6659	136.051	235.851	424.415	515.209	1346	4171.83	5786.28	9125.94	10685.3
27	1.76116	95.583	335.09	516.993	304.118	1930.28	4138.34	4796.14	7957.93	10002
28	15.8708	135.536	203.436	384.11	723.244	2439.14	3271.19	6614.61	8165.07	10488.1
29	17.2961	126.528	435.437	572.825	1734.42	2275.11	4105.13	3602.78	6252.26	8297.08
30	13.7984	124.195	220.601	362.461	425.179	1137.98	2860.19	1001.09	5593.89	8252.31
31	5.02236	23.663	80.29	99.0511	313.826	688.6	879.915	2092.3	1790.08	4172.28
32	5.58753	56.3537	21.7746	249.137	318.395	622.932	1619.38	2105.13	4438.08	3596.88
33	4.12516	69.1654	230.377	158.406	160.039	424.638	1940.16	2230.16	276.647	4493.25
34	8.37162	4.31954	6.56134	20.1565	41.8823	281.153	22.0431	224.135	25.7743	1824.08
35	0.739873	5.7775	7.93882	31.0376	83.0171	231.521	429.08	239.437	1137.98	1784.93
36	3.51641	0.56509	1.85327	22.242	179.853	112.564	227.796	25.7086	797.607	825.973
37	2.46794	1.09528	2.56281	8.52495	13.8871	91.4117	20.2202	69.6322	247.827	0
38	2.54467	7.21444	5.27016	12.7403	42.9395	96.4689	28.97	92.3534	0	0
39	0.860295	2.70993	6.91102	24.0852	41.564	32.8417	18.9657	45.9475	321.618	249.145
40	7.25687	6.79404	99.0109	96.4674	20.6287	91.8976	125.5	14.5618	49.9429	149.042
41	17.3249	93.6153	22.5924	112.179	26.9786	115.925	220.863	137.005	145.563	0
42	4.69735	3.48791	13.8733	32.8373	74.1626	182.429	60.087	31.1805	46.1955	177.278
43	2.56863	16.7188	48.8514	67.4797	41.7974	49.0922	399.072	348.282	319.032	383.011
44	3.00339	1.01068	3.16046	26.2735	47.7277	223.682	134.386	75.9523	407.3	753.71
45	3.30271	11.8022	15.55	53.3722	27.0872	33.8016	293.335	159.508	923.84	949.379
46	1.31522	0.354991	45.2645	102.892	14.3531	41.5187	162.582	145.424	221.822	200.46
47	0.360822	1.67738	13.9173	55.7093	69.5763	82.4338	320.316	191.262	650.061	1015.22
48	0.835256	41.1547	37.9953	39.9854	40.9653	105.041	408.797	1551.15	1600.14	3388.64
49	8.3347	17.7856	6.11864	13.2993	133.262	156.286	439.952	758.529	1674.81	1791.23
50	0.814286	20.7392	146.234	280.238	467.18	964.694	317.997	2630.63	2468.88	2103.06
51	1.23728	22.8884	41.8557	220.001	213.277	164.474	269.201	696.478	244.542	296.619
52	5.95673	5.28547	183.764	188.939	327.141	190.605	564.882	2266.18	4425.11	2218.63
53	2.10343	3.01406	95.6836	543.757	1018.77	1452.74	425.584	1830.92	550.107	962.855
54	6.33114	10.9662	107.69	302.698	656.659	732.54	649.008	1403.05	3443.64	4307.13
55	8.08379	25.5445	29.0594	100.823	203.197	295.275	738.501	649.424	2038.12	2989.84
56	2.88766	43.336	33.3231	498.831	1149.15	1027.92	1767.87	1515.93	2223.22	6372.11
57	7.94454	2.68203	23.2155	165.2	337.032	209.435	1724.25	622.421	1658.2	1749.82
58	4.47531	5.26658	25.6005	46.9538	257.359	422.786	2262.52	1703.63	3118.19	4824.5
59	2.31273	6.3734	42.4065	73.7717	295.618	169.066	310.003	415.547	1535.92	5115.57
60	3.16535	34.7231	23.9508	37.3038	76.5631	275.236	503.866	210.301	194.172	365.493
61	1.4153	31.5142	49.6204	80.4081	26.8324	120.572	198.645	261.271	154.374	1054.65
62	4.41825	1.9046	9.1994	23.8855	18.763	42.7818	146.005	523.941	1126.54	527.094
63	4.08096	87.3086	247.02	471.688	989.978	775.002	181.005	266.345	692.517	822.218
64	0.502155	116.438	199.187	440.844	686.764	889.933	526.888	290.246	751.426	929.307
65	0.550073	44.9018	97.0929	212.494	336.815	412.295	475.055	276.808	255.754	1240.03
66	3.42941	24.8276	41.3265	60.5804	255.007	252.04	178.607	705.948	559.61	1620.86
67	7.99585	2.59874	187.767	39.4513	237.401	476.325	1423.34	845.86	1418.38	2819.2
68	12.7155	91.3814	83.1939	191.764	254.642	101.679	3578.62	1619.36	1006.66	6133.82
69	4.0077	54.7414	359.232	600.255	234.377	2050.56	1191.53	3397.24	5424.08	7046.91
70	5.88825	5.21173	139.244	229.751	673.306	882.36	2060.7	1761.88	2156.53	5039.42
71	9.74044	76.227	81.749	233.558	258.91	501.306	317.87	1079.25	2173.03	3800.59
72	5.44962	68.7572	170.545	395.281	733.142	359.431	1308.94	199.363	954.211	776.183
73	1.30011	52.0781	41.1724	90.7688	156.693	124.095	179.931	1235.86	1294.85	219.79
74	0.042144	2.96151	20.0489	69.2581	143.448	175.227	349.251	165.895	624.325	738.017
75	0.185038	22.2522	96.728	162.56	141.916	674.99	581.053	1584.09	3790.95	2780.86
76	0.096743	9.53597	29.0792	81.955	163.487	351.953	307.375	1180.69	1442.28	2921.34
77	2.15387	27.4291	59.1213	74.0004	111.938	295.99	191.619	635.401	852.654	3208.89
78	10.2651	28.0286	59.7865	89.013	279.293	84.7232	104.054	456.611	1118.12	146.726
79	0.942231	4.0483	68.2303	149.495	16.2934	138.443	1240.11	2553.07	1372.95	695.788
80	1.0001	4.97788	38.0902	165.084	595.521	909.993	1901.78	1285.81	349.953	1211.57
81	5.58303	4.76365	45.3888	32.0781	101.465	22.1695	2270.43	1755.26	2442.97	5778.13
82	4.32455	16.0632	38.9727	117.283	150.178	46.3303	782.764	1054.47	1102.79	940.54
83	2.84721	19.5407	96.3648	224.18	444.088	822.48	873.754	1547	1686.65	632.178
84	1.38856	11.5159	17.7011	19.3728	157.51	285.855	1314.79	809.877	1102.41	2501.96
85	9.26483	75.3393	124.648	141.088	72.423	966.581	477.786	1333.84	1075.39	708.941
86	0	79.8327	180.423	305.18	80.7882	366.918	1011.76	2163.04	3478.35	3126.12
87	8.81224	3.4071	47.3778	52.6849	169.622	71.1681	330.496	696.502	648.268	382.025
88	0.994176	8.54875	139.094	573.73	579.537	1013.08		1736.41	885.858	1810.42
89	2.33168	18.3646	109.251	116.276	246.418	261.31	271.852	414.795	489.002	1609.71
90	7.9381	15.8808	31.0406	103.985	193.911	234.276	199.704	230.952	831.124	1488.44
91	12.9321	9.21967	53.0557	7.39961	37.2172	324.841		951.244	1186.17	474.635
92	13.6092	81.2309	331.34	217.925	420.252	916.159	1516.33	294.852	310.863	474.635
93	1.33796	12.2035	20.9693	127.592	227.409	112.503	836.192	1060.64	1415.65	1806.59
94	4.38455	4.77045	48.375	48.26	178.27	180.98		851.332	1171.02	267.77
95	2.57553	5.89676	8.31078	56.379	297.546	472.226	301.478	933.742	1186.41	1094.48
96	1.96288	7.111	36.0024	27.2753	77.7408	81.3073	539.013	356.144	307.843	459.741
97	6.30762	3.78063	201.802	317.652	781.834	516.066		677.022	1334.77	726.501
98	5.52217	5.46946	26.2651	53.9165	105.743	1012.15	396.246	482.265	989.625	3015.33
99	0.499702	9.54673	49.2102	273.203	401.388	599.047	1568.27	1354.73	1305.48	2111.67
B	2	4	6	8	10	12	14	16	18	20
1	0.314468	0.506506	0.928661	0.830419	0.786173	0.887343	0.956098	0.956551	0.805943	0.934969
2	0.95252	0.69751	0.752812	0.836629	0.858336	0.952623	0.887747	0.95499	0.932696	0.989146
3	0.957186	0.978158	0.97102	0.926543	0.853548	0.925691	0.822608	0.983616	0.941394	0.971003
4	0.946892	0.431049	0.415305	0.415484	0.889297	0.90316	0.855816	0.815265	0.858027	0.887891
5	0.876337	0.63875	0.434229	0.48575	0.575482	0.765364	0.600184	0.643287	0.696396	0.862097
6	0	0.137292	0.445358	0.122522	0.105019	0.450559	0.478086	0.389419	0.407007	0.369421
7	0.172274	0.719414	0.507526	0.724192	0.449805	0.586831	0.670078	0.471507	0.567503	0.565463
8	0.939988	0.459626	0.679117	0.913861	0.860169	0.807808	0.732071	0.680449	0.650588	0.921447
9	0.370713	0.572992	0.534819	0.673156	0.930447	0.872717	0.67252	0.81215	0.773661	0.753007
10	0.715975	0.683395	0.805905	0.856356	0.873977	0.823349	0.477842	0.790703	0.853503	0.722889
11	0.895808	0.450305	0.465494	0.884497	0.571522	0.625043	0.679008	0.531617	0.55901	0.751215
12	0.97224	0.968756	0.658862	0.626071	0.812121	0.890217	0.499405	0.862314	0.772774	0.767706
13	0.224827	0.953449	0.864704	0.113842	0.814607	0.558262	0.310558	0.855109	0.574914	0.602183
14	0.752979	0.98812	0.818673	0.951697	0.932271	0.911526	0.458767	0.811738	0.732746	0.724173
15	0.95457	0.886355	0.897806	0.49403	0.846363	0.874908	0.221631	0.455316	0.725907	0.626789
16	0.680233	0.807347	0.901473	0.741859	0.599262	0.555444	0.435013	0.484073	0.278619	0.322199
17	0.96321	0.970848	0.975054	0.886718	0.685401	0.435582	0.176622	0.499048	0.551801	0.485224
18	0.961966	0.956757	0.849044	0.870802	0.880364	0.484032	0.186939	0.320919	0.361387	0.277788
19	0.996195	0.878241	0.913386	0.77386	0.880418	0.874518	0.505279	0.608798	0.185984	0.223811
20	0.912303	0.998898	0.964579	0.894593	0.720541	0.524867	0.318067	0.36246	0.203796	0.174521
21	0.320858	0.971024	0.746523	0.733212	0.760155	0.326607	0.161955	0.376881	0.313708	0.220834
22	0	0	0.841657	0.764726	0.284549	0.136144	0.294581	0.214701	0.271164	0.184153
23	0	0.0276008	0	0.0600776	0.19562	0.0719136	0.0913675	0.103995	0.263151	0.277788
24	0	0.8189	0.396303	0.371017	0.636615	0.662873	0.237816	0.215484	0.183357	0.195685
25	0.782987	0.354808	0.421467	0.262827	0.469032	0.244629	0.403296	0.310365	0.238396	0.281372
26	0.279366	0.0324127	0.503003	0.622697	0.765494	0.645455	0.307991	0.357003	0.287754	0.392052
27	0.899797	0.320216	0.293881	0.540395	0.861576	0.491552	0.313545	0.467031	0.378913	0.43093
28	0.0970188	0.0360739	0.571309	0.658527	0.670804	0.357515	0.457385	0.264955	0.362746	0.403269
29	0.0159246	0.100135	0.0824256	0.490761	0.210552	0.400722	0.319053	0.599643	0.512034	0.527931
30	0.21493	0.116727	0.535139	0.677773	0.806473	0.700248	0.525561	0.888755	0.563418	0.530479
31	0.714249	0.83171	0.830809	0.911944	0.857157	0.818618	0.854043	0.767494	0.860291	0.762615
32	0.682093	0.599214	0.954115	0.778518	0.855077	0.835916	0.731382	0.766069	0.653624	0.795353
33	0.765296	0.508098	0.514537	0.859177	0.927156	0.888148	0.678172	0.752175	0.978409	0.744353
34	0.523691	0.96928	0.986174	0.982081	0.980937	0.925942	0.996344	0.975093	0.997988	0.896218
35	0.957904	0.958911	0.983271	0.972408	0.962213	0.939016	0.928826	0.973393	0.911185	0.898445
36	0.799931	0.995981	0.996095	0.980227	0.918137	0.97035	0.962214	0.997143	0.93775	0.953006
37	0.859585	0.99221	0.9946	0.992421	0.993679	0.975922	0.996646	0.992262	0.980658	1
38	0.855219	0.948691	0.988894	0.988674	0.980455	0.974589	0.995195	0.989737	1	1
39	0.951053	0.980727	0.985437	0.978588	0.981081	0.991349	0.996854	0.994894	0.974899	0.985825
40	0.587115	0.951681	0.791359	0.914241	0.990611	0.975794	0.979182	0.998382	0.996102	0.99152
41	0.0142893	0.334211	0.952392	0.900273	0.98772	0.969465	0.963364	0.984775	0.988639	1
42	0.732741	0.975194	0.970766	0.970808	0.966244	0.951947	0.990033	0.996535	0.996395	0.989914
43	0.853856	0.881097	0.897058	0.940011	0.980975	0.987069	0.933803	0.961297	0.975101	0.978208
44	0.82912	0.992812	0.99334	0.976643	0.978276	0.941081	0.977708	0.99156	0.968212	0.957117
45	0.81209	0.916063	0.967232	0.952552	0.987671	0.991096	0.951343	0.982275	0.927898	0.945984
46	0.92517	0.997475	0.904616	0.908529	0.993467	0.989064	0.973031	0.98384	0.982688	0.988595
47	0.979471	0.988071	0.970673	0.950475	0.968331	0.978286	0.946867	0.978746	0.949265	0.942238
48	0.952477	0.707309	0.919934	0.964453	0.981354	0.972331	0.93219	0.827629	0.875115	0.807201
49	0.525791	0.873509	0.987106	0.988177	0.939344	0.958833	0.927022	0.915709	0.869288	0.898087
50	0.953671	0.852503	0.691849	0.750869	0.787355	0.745893	0.947252	0.707673	0.807313	0.880345
51	0.929604	0.837219	0.9118	0.80442	0.902924	0.956677	0.955346	0.922604	0.980914	0.983124
52	0.661087	0.96241	0.612763	0.832034	0.851097	0.949793	0.906299	0.748172	0.654636	0.873769
53	0.880324	0.978564	0.798371	0.516602	0.536289	0.61734	0.929405	0.79654	0.957066	0.945218
54	0.639785	0.922009	0.77307	0.730902	0.701111	0.807044	0.892345	0.844087	0.731236	0.754943
55	0.540066	0.818329	0.938764	0.910369	0.907512	0.922223	0.8775	0.927833	0.840933	0.829891
56	0.835704	0.691795	0.92978	0.556541	0.476947	0.729239	0.706751	0.831543	0.826486	0.637454
57	0.547989	0.980925	0.951079	0.853138	0.846595	0.944834	0.713986	0.930834	0.870583	0.900443
58	0.745374	0.962544	0.946053	0.958258	0.882859	0.888636	0.6247	0.810685	0.756637	0.725507
59	0.868416	0.954673	0.910639	0.934417	0.865445	0.955467	0.948578	0.953823	0.880127	0.708946
60	0.819905	0.75305	0.94953	0.966837	0.965151	0.927501	0.91642	0.97663	0.984846	0.979205
61	0.919475	0.775872	0.895437	0.928518	0.987787	0.968241	0.967049	0.970966	0.987952	0.939995
62	0.74862	0.986455	0.980615	0.978766	0.99146	0.988731	0.975781	0.941777	0.912078	0.970011
63	0.767811	0.379064	0.479467	0.580671	0.549395	0.79586	0.969975	0.970403	0.945952	0.953219
64	0.97143	0.171896	0.580262	0.608091	0.687408	0.765586	0.912602	0.967747	0.941354	0.947126
65	0.968703	0.68066	0.795401	0.811094	0.846693	0.891399	0.921199	0.96924	0.980039	0.929447
66	0.804881	0.823427	0.912915	0.946144	0.883929	0.933611	0.970373	0.921552	0.956324	0.90778
67	0.54507	0.981518	0.604329	0.964928	0.891943	0.874533	0.763902	0.906004	0.8893	0.839599
68	0.276543	0.350098	0.82469	0.829522	0.884096	0.973217	0.40639	0.820049	0.921434	0.651012
69	0.771979	0.610681	0.243008	0.466375	0.893319	0.459869	0.802353	0.622484	0.576671	0.599061
70	0.664983	0.962934	0.706578	0.795752	0.693534	0.767581	0.658178	0.804212	0.831691	0.713278
71	0.44581	0.457876	0.827734	0.792367	0.882153	0.867953	0.947273	0.880069	0.830403	0.783762
72	0.689939	0.511001	0.64062	0.648596	0.666298	0.905324	0.782877	0.977846	0.925527	0.955838
73	0.92603	0.629622	0.913239	0.919307	0.928679	0.967313	0.970154	0.862665	0.898941	0.987495
74	0.997602	0.978938	0.957752	0.93843	0.934707	0.953844	0.942067	0.981565	0.951274	0.95801
75	0.989472	0.841743	0.79617	0.855485	0.935404	0.822203	0.903617	0.823969	0.70413	0.841781
76	0.994496	0.93218	0.938723	0.927142	0.925586	0.907293	0.949014	0.868796	0.887435	0.833788
77	0.877454	0.804925	0.875417	0.934214	0.94905	0.922034	0.968215	0.929391	0.933453	0.817428
78	0.415961	0.800662	0.874015	0.920868	0.872875	0.977683	0.98274	0.949259	0.912735	0.991652
79	0.946391	0.971209	0.856222	0.867099	0.992584	0.963533	0.794294	0.716292	0.892847	0.960413
80	0.943098	0.964597	0.919734	0.853241	0.728939	0.760302	0.684538	0.857115	0.972687	0.931067
81	0.682349	0.966121	0.904355	0.971483	0.953817	0.99416	0.623389	0.804948	0.809335	0.671249
82	0.753952	0.885759	0.917875	0.895736	0.931644	0.987796	0.870158	0.882822	0.913932	0.946487
83	0.838006	0.861027	0.796935	0.800705	0.797866	0.783354	0.855064	0.82809	0.868363	0.964032
84	0.920997	0.918099	0.962699	0.982778	0.928307	0.924704	0.781908	0.910003	0.913961	0.857649
85	0.472871	0.464189	0.737335	0.874573	0.967035	0.745396	0.920746	0.851777	0.91607	0.959664
86	1	0.432232	0.619804	0.728696	0.963228	0.903352	0.832173	0.759633	0.728528	0.822137
87	0.498621	0.975769	0.900163	0.953163	0.922794	0.981254	0.945178	0.922602	0.949405	0.978264
88	0.943436	0.939202	0.706895	0.489956	0.736214	0.733147	1	0.807042	0.930862	0.896995
89	0.867338	0.869392	0.769781	0.896631	0.887839	0.931169	0.954906	0.953906	0.961835	0.908415
90	0.548356	0.887056	0.93459	0.907558	0.911738	0.93829	0.966874	0.974336	0.935134	0.915314
91	0.264217	0.93443	0.888198	0.993422	0.98306	0.914435	1	0.894293	0.907424	0.972995
92	0.225696	0.422289	0.301784	0.806265	0.808716	0.758678	0.748475	0.967235	0.975738	0.972995
93	0.923876	0.913209	0.955812	0.886572	0.896491	0.970366	0.861295	0.882136	0.889514	0.897213
94	0.750538	0.966073	0.898062	0.957097	0.918857	0.952329	1	0.905396	0.908606	0.984765
95	0.853463	0.958062	0.982487	0.949879	0.864567	0.875613	0.949992	0.896238	0.907405	0.937729
96	0.88832	0.949427	0.924134	0.975752	0.964615	0.978583	0.91059	0.960424	0.975974	0.973843
97	0.641123	0.973112	0.574752	0.717609	0.644136	0.864065	1	0.924766	0.895826	0.958665
98	0.685812	0.961101	0.944653	0.952068	0.951869	0.733392	0.934272	0.946409	0.922763	0.828441
99	0.971569	0.932104	0.896302	0.757123	0.817302	0.842207	0.739861	0.849457	0.898112	0.879855
the mean of B	0.70011	0.751535	0.781986	0.797911	0.823385	0.813186	0.761183	0.798288	0.787713	0.78757
